# Supplementary material for: Could COVID-19 pandemic be stopped with joint efforts of travel restrictions and public health countermeasures? A modelling study
Source: PubMed Central journal article supplement — BMJ Open. 2021 May 24;11(5):e046157. doi: 10.1136/bmjopen-2020-046157 (PMC8149266; doi:10.1136/bmjopen-2020-046157), 2021-05-24
Supplement: bmjopen-2020-046157.draft_revisions.pdf [file bmjopen-2020-046157.draft_revisions.pdf]

# BMJ Open

BMJ Open is committed to open peer review. As part of this commitment we make the peer review history of every article we publish publicly available.

When an article is published we post the peer reviewers' comments and the authors' responses online. We also post the versions of the paper that were used during peer review. These are the versions that the peer review comments apply to.

The versions of the paper that follow are the versions that were submitted during the peer review process. They are not the versions of record or the final published versions. They should not be cited or distributed as the published version of this manuscript.

BMJ Open is an open access journal and the full, final, typeset and author-corrected version of record of the manuscript is available on our site with no access controls, subscription charges or pay-per-view fees (<http://bmjopen.bmj.com>).

If you have any questions on BMJ Open's open peer review process please email [info.bmjopen@bmj.com](mailto:info.bmjopen@bmj.com)

# BMJ Open

## Could COVID-19 Pandemic be Stopped with Joint Efforts of Travel Restrictions and Public Health Countermeasures: a modelling study

|                               |                                                                                                                                                                                                                                                                                                                                                                                                                                                                                                                                                                                                                                                                                                                         |
|-------------------------------|-------------------------------------------------------------------------------------------------------------------------------------------------------------------------------------------------------------------------------------------------------------------------------------------------------------------------------------------------------------------------------------------------------------------------------------------------------------------------------------------------------------------------------------------------------------------------------------------------------------------------------------------------------------------------------------------------------------------------|
| Journal:                      | <i>BMJ Open</i>                                                                                                                                                                                                                                                                                                                                                                                                                                                                                                                                                                                                                                                                                                         |
| Manuscript ID                 | bmjopen-2020-046157                                                                                                                                                                                                                                                                                                                                                                                                                                                                                                                                                                                                                                                                                                     |
| Article Type:                 | Original research                                                                                                                                                                                                                                                                                                                                                                                                                                                                                                                                                                                                                                                                                                       |
| Date Submitted by the Author: | 24-Oct-2020                                                                                                                                                                                                                                                                                                                                                                                                                                                                                                                                                                                                                                                                                                             |
| Complete List of Authors:     | Kong, Lingcai; North China Electric Power University, Mathematics and Physics<br>Hu, Yi; Fudan University, Epidemiology and Biostatistics<br>Wang, Qiang; Southeast University, Key Laboratory of Environmental Medicine Engineering<br>Wang, Yu; Peking University, Global Health<br>Yao, Tong; North China Electric Power University, Mathematics and Physics<br>Chen, Xinda; North China Electric Power University, Mathematics and Physics<br>Jin, Hui; Southeast University, Key Laboratory of Environmental Medicine Engineering<br>Fan, Lijun; Southeast University, Key Laboratory of Environmental Medicine Engineering<br>Du, Wei; Southeast University, Key Laboratory of Environmental Medicine Engineering |
| Keywords:                     | HEALTH SERVICES ADMINISTRATION & MANAGEMENT, HEALTH ECONOMICS, Public health < INFECTIOUS DISEASES                                                                                                                                                                                                                                                                                                                                                                                                                                                                                                                                                                                                                      |
|                               |                                                                                                                                                                                                                                                                                                                                                                                                                                                                                                                                                                                                                                                                                                                         |

SCHOLARONE™  
Manuscripts

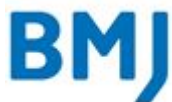

I, the Submitting Author has the right to grant and does grant on behalf of all authors of the Work (as defined in the below author licence), an exclusive licence and/or a non-exclusive licence for contributions from authors who are: i) UK Crown employees; ii) where BMJ has agreed a CC-BY licence shall apply, and/or iii) in accordance with the terms applicable for US Federal Government officers or employees acting as part of their official duties; on a worldwide, perpetual, irrevocable, royalty-free basis to BMJ Publishing Group Ltd ("BMJ") its licensees and where the relevant Journal is co-owned by BMJ to the co-owners of the Journal, to publish the Work in this journal and any other BMJ products and to exploit all rights, as set out in our [licence](#).

The Submitting Author accepts and understands that any supply made under these terms is made by BMJ to the Submitting Author unless you are acting as an employee on behalf of your employer or a postgraduate student of an affiliated institution which is paying any applicable article publishing charge ("APC") for Open Access articles. Where the Submitting Author wishes to make the Work available on an Open Access basis (and intends to pay the relevant APC), the terms of reuse of such Open Access shall be governed by a Creative Commons licence – details of these licences and which [Creative Commons](#) licence will apply to this Work are set out in our licence referred to above.

Other than as permitted in any relevant BMJ Author's Self Archiving Policies, I confirm this Work has not been accepted for publication elsewhere, is not being considered for publication elsewhere and does not duplicate material already published. I confirm all authors consent to publication of this Work and authorise the granting of this licence.

1  
2  
3  
4 **Could COVID-19 Pandemic be Stopped with Joint Efforts of Travel Restrictions**  
5  
6 **and Public Health Countermeasures: a modelling study**  
7  
8  
9  
10

11 **Author names**

12  
13  
14 Lingcai Kong<sup>1\*</sup>, Yi Hu<sup>2\*</sup>, Qiang Wang<sup>3</sup>, Yu Wang<sup>4</sup>, Tong Yao<sup>1</sup>, XinDa Chen<sup>1</sup>, Hui Jin<sup>3</sup>,

15  
16  
17 Lijun Fan<sup>3</sup>, Wei Du<sup>3</sup>

18  
19  
20 <sup>1</sup> Department of Mathematics and Physics, North China Electric Power University, Baoding  
21  
22 071003, China;

23  
24  
25 <sup>2</sup> Department of Epidemiology and Biostatistics, School of Public Health, Fudan University,  
26  
27 Shanghai 200032, China;

28  
29  
30 <sup>3</sup> Key Laboratory of Environmental Medicine Engineering, Ministry of Education, School of  
31  
32 Public Health, Southeast University, Nanjing 210009, Jiangsu, China;

33  
34  
35 <sup>4</sup> Department of Global Health, School of Public Health, Peking University, Beijing 100191,  
36  
37 China

38  
39  
40  
41  
42  
43 \* LK and YH contributed equally to the manuscript.  
44  
45  
46  
47

48 Corresponding author: Wei Du, Key Laboratory of Environmental Medicine Engineering,  
49  
50 Ministry of Education, School of Public Health, Southeast University, Nanjing 210009,  
51  
52 Jiangsu, China. Email: duwei@seu.edu.cn. Tel: +86 (25) 8327 2303  
53  
54  
55  
56  
57

58 **Abstract**  
59  
60

1  
2  
3  
4 **Objective:** We aim to explore and compare the effect of global travel restrictions and public health  
5  
6 countermeasures in response to COVID-19 outbreak.  
7

8  
9 **Design:** A data-driven spatio-temporal modeling to simulate the spread of COVID-19 worldwide for 150  
10  
11 days since January 1,2020 under different scenarios.  
12

13  
14 **Setting:** Worldwide.  
15

16  
17 **Interventions:** Travel restrictions and public health countermeasures.  
18

19  
20 **Main outcome:** The cumulative number of COVID-19 cases.  
21

22 **Results:** The cumulative number of COVID-19 cases could reach more than 420 million around the  
23  
24 world without any countermeasures taken. Under timely and intensive global interventions, 99.97% of  
25  
26 infections could be avoided comparing with non-interventions. The scenario of carrying out domestic  
27  
28 travel restriction and public health countermeasures in China-only could contribute to a significant  
29  
30 decrease of the cumulative number of infected cases worldwide. Without global travel restriction, 98.62%  
31  
32 of COVID-19 cases could be avoided by public health countermeasures in China-only compared with  
33  
34 non-interventions at all.  
35  
36  
37  
38  
39

40 **Conclusions:** Public health countermeasures were generally more effective than travel restrictions in  
41  
42 many countries, suggesting multi-national collaborations in the public health communities in response  
43  
44 to this novel global health challenge.  
45  
46

47  
48 **Keywords:** COVID-19, Travel Restrictions, Countermeasures, public health  
49

#### 50 **Strengths and limitations of this study** 51

- 52  
53 • Under timely and intensive global interventions, 99.97% of infections could be avoided comparing  
54  
55 with non-interventions.  
56
- 57  
58 • The scenario of carrying out domestic travel restriction and public health countermeasures in China-  
59  
60

1  
2  
3  
4 only could contribute to a significant decrease of the cumulative number of infected cases  
5  
6 worldwide.

- 7  
8  
9 • Public health countermeasures were generally more effective than travel restrictions in many  
10  
11 countries, suggesting multi-national collaborations in the public health communities in response to  
12  
13 this novel global health challenge.  
14  
15  
16 • The analysis was limited to the study time. Our hypothetical scenarios were based on counterfactual  
17  
18 and backtrack the results to compare with the current situations.  
19  
20  
21

## 22 **Introduction**

23  
24 Novel infectious diseases appear to be emerging faster now than ever before, possibly driven by a variety  
25  
26 of factors, including population growth, cross-species interactions, climate change, and international  
27  
28 travel and trade. Globally, as at October 18 2020, a total of 39,442,444 peoples have been confirmed  
29  
30 COVID-19 cases, including 1,039,406 deaths, reported by the World Health Organization (WHO).<sup>1</sup>  
31  
32 WHO declared COVID-19 a Public Health Emergency of International Concern on 30 January 2020 <sup>2</sup>  
33  
34 and then a pandemic on 9 March, and called on Member States to respond to the COVID-19 pandemic  
35  
36 by implementing nation-wide COVID-19 countermeasure strategies.  
37  
38  
39

40  
41 In the absence of effective drugs and vaccines, non-pharmaceutical interventions were effective in  
42  
43 controlling the SARS-CoV-2 transmission in different populations.<sup>3 4</sup> A series of social distancing  
44  
45 countermeasures including school closures and restriction on mass gathering were implemented to  
46  
47 minimize risk of spread between humans. Travel restrictions were enforced by several countries to  
48  
49 uphold boarder security and shut down the transmission passage from any imported infected cases. The  
50  
51 decline of COVID-19 cases in China showed the effectiveness of non-pharmaceutical public health  
52  
53 interventions. However, over the past eight months, the number of cases reported has increased rapidly  
54  
55  
56  
57  
58  
59  
60

1  
2  
3  
4 without showing signs of decay around the world. Selection of intervention strategies seem to be  
5  
6 associated with the variation in domestic and global responses to the COVID-19 pandemic.  
7  
8

9 In February and March, WHO did not recommend imposing travel or trade restrictions on countries  
10  
11 experiencing COVID-19 outbreaks.<sup>5</sup> The International Health Regulations (2005) (IHR) formulated the  
12  
13 global joint response to the disease in order to avoid unnecessary international traffic and trade  
14  
15 restrictions.<sup>6</sup> WHO commented that travel and trade restrictions would cause harm than good.<sup>7</sup> More than  
16  
17 130 countries have implemented different forms of travel restrictions, including suspensions of flights,  
18  
19 halting visa-on-arrival programs, discouraging travel to and from high-risk areas, and closing borders  
20  
21 for foreigners.<sup>8</sup> Recently, a few reports explored the effectiveness of travel restrictions on COVID-19 in  
22  
23 different countries.<sup>9 10</sup> To some extent, travel restrictions avoided the importation of infected cases by  
24  
25 breaking the chains of transmission between different locations, however the containment effect on  
26  
27 COVID-19 pandemic was unknown. Nonetheless, an Australian study showed the travel restrictions to  
28  
29 and from China were somewhat effective on containing the COVID-19.<sup>11</sup>  
30  
31  
32  
33  
34  
35  
36  
37

38 The purpose of this study was to compare the current situations with our assumed scenarios under  
39  
40 different intervention strategies to explore the effectiveness of different interventions in containing the  
41  
42 COVID-19 transmission. Findings may support local decision makers to select intervention strategies  
43  
44 particularly in relation to travel restrictions to prevent, contain, and manage COVID-19 spread in the  
45  
46 nearer future.  
47  
48  
49

## 50 **Methods**

### 51 **Data sources**

52  
53  
54 Size of population by country were obtained from Worldometer.<sup>12</sup> Air flights data were obtained from  
55  
56 the OpenFlights databases,<sup>13</sup> which contains information of 7698 airports and 67,663 domestic and  
57  
58  
59  
60

1  
2  
3  
4 international routes and other related data. International routes were aggregated to the country level, with  
5  
6 total numbers of seats on all the flights estimated as the proxy number of passengers travelling from  
7  
8 country to country.  
9

10  
11 Information on travel restrictions against China was obtained from the National Immigration  
12  
13 Administration (<https://www.nia.gov.cn/>), and complemented with information from the council on  
14  
15 foreign relations (<https://www.thinkglobalhealth.org/article/travel-restrictions-china-due-covid-19>).  
16  
17 Other travel restriction information was obtained from the International Air Transport Association (IATA)  
18  
19 updated on 1 April 2020 ([www.iatatravelcentre.com/international-travel-document-news](http://www.iatatravelcentre.com/international-travel-document-news)).  
20  
21  
22  
23

#### 24 **Epidemic simulation model**

25  
26 We employed the SimInf R package to implement the COVID-19 spatio-temporal modelling.<sup>14 15</sup> The  
27  
28 model comprised multiple nodes and each node, representing one country, contained the susceptible (S),  
29  
30 Exposed (E), infected (I) and Removed (R) compartments. Transitions between these compartments were  
31  
32 modelled as a continuous-time discrete state Markov chain (CTMC). Individuals' movements across  
33  
34 different countries were processed with scheduled events, causing the change of the population in each  
35  
36 country. We only considered the movement of individuals in one country to a destination country,  
37  
38 irrespective of the birth or death. The scheduled movements were carried on when the simulation in  
39  
40 continuous time reaches the pre-defined time. The individuals were randomly sampled from the  
41  
42 compartments affected by the event. At time  $t$ , there were  $a_{ij,t}$  susceptible individuals moved from  
43  
44 node  $i$  to  $j$ , while  $a_{ji,t}$  susceptible individuals moved from  $j$  to  $i$ . The number of Exposed, Infected  
45  
46 and Removed individuals travelled from country  $i$  to  $j$  were noted by  $b_{ij,t}$ ,  $c_{ij,t}$  and  $d_{ij,t}$ , respectively.  
47  
48  
49  
50  
51  
52  
53  
54  
55  
56 Transitions between compartments in one country and the movements between different countries were  
57  
58 illustrated by Figure 1. The number of individuals' movements across countries were estimated to  
59  
60



1  
2  
3  
4 represent different scenarios. We implemented a classic SEIR transmission model to simulate the spread  
5  
6 of COVID-19. For simplicity, we presented the deterministic version of the transmission model in each  
7  
8 country, described by the following set of differential equations:  
9

$$\begin{aligned}\frac{dS}{dt} &= -\frac{\beta SI}{N} \\ \frac{dE}{dt} &= \frac{\beta SI}{N} - \sigma E \\ \frac{dI}{dt} &= \sigma E - \gamma I \\ \frac{dR}{dt} &= \gamma I\end{aligned}$$

10  
11  
12  
13  
14  
15  
16  
17  
18  
19  
20  
21  
22 where  $1/\sigma$  is the latent period with value of 6.4 days, and  $1/\gamma$  is the recovery period with value of  
23  
24 days.<sup>16 17</sup> In our model, we set the reproductive number,  $R_0 = 2.35$ , corresponding to the effective  
25  
26 contact rate  $\beta = 0.8103$ .<sup>17</sup>

27  
28  
29 We assumed 10 initial infectious cases of COVID-19 emerging from Wuhan city of China. The number  
30  
31 of susceptible individuals were set to the size of population in each country, while the number of exposed  
32  
33 and recovered were all set to zero. We ran the models for 150 days and used the cumulative number of  
34  
35 infections to investigate the influence of travel restrictions and public health countermeasures including  
36  
37 social distancing, isolation of cases, quarantine of close contacts, etc., during the global spread of  
38  
39 COVID-19. The first day of the simulation was set on 1 January, 2020.  
40  
41  
42  
43  
44

#### 45 **Modelling scenarios**

46  
47  
48 Seven scenarios were modelled to simulate the spread of COVID-19 around the world (Table 1). The  
49  
50 baseline scenario for comparison was set assuming neither travel restrictions nor public health  
51  
52 countermeasures. Additional six scenarios were then modelled assuming different combination of travel  
53  
54 restrictions and public health countermeasures.  
55  
56

57  
58 We separated global travel restrictions into three situations, i.e., none, travel restrictions against China,  
59  
60

1  
2  
3  
4 or multinational travel restrictions. After WHO declared COVID 19 a Public Health Emergency of  
5  
6 International Concern, many countries imposed travel restrictions against China, most of which were  
7  
8 effective on 1 February, 2020. Since March 2020, COVID-19 has spread around almost everywhere in  
9  
10 the world. Responsive to this pandemic, country-wide travel bans were implemented strictly worldwide.  
11  
12 We collected the information on multinational travel bans from IATA <sup>18</sup>(updated on 1 April, 2020), from  
13  
14 which we assumed global travel restrictions were carried out on 20 March, 2020.  
15  
16

17  
18 We separated the public health countermeasures into three situations, i.e., none, public health  
19  
20 countermeasures implemented in China, or global public health countermeasures implemented  
21  
22 worldwide. In the study, public health countermeasures represented a series of activities reducing  
23  
24 effective contact rate between humans. These activities included isolating confirmed cases, quarantining  
25  
26 close contacts, suspending public transports, closing schools and entertainment venues, and banning  
27  
28 public gatherings.<sup>19</sup> These public health countermeasures have been put in place to stop transmission of  
29  
30 COVID-19 since late January 2020, which demonstrated a reduced daily contact by most, during the  
31  
32 COVID-19 social distancing period, with most human interactions restricted to be held within each  
33  
34 household.<sup>20</sup> We assumed the global public health countermeasures were implemented in a less strict  
35  
36 way than those in China. Therefore, for public health countermeasures implemented in China, we set the  
37  
38 effective contact rate in China reducing 85% after 24 Jan, 2020, whereas for global public health  
39  
40 countermeasures, we set the effective contact rate among other countries reducing 50% from 25 Jan,  
41  
42 2020.  
43  
44  
45  
46  
47  
48  
49  
50  
51

### 52 53 **Patient and Public Involvement statement**

54  
55 Patients and the public were not involved in this study.  
56  
57

### 58 59 **Results**

1  
2  
3  
4 Table 2 presented the median estimates of the total cumulative number of infections worldwide for each  
5  
6 scenario. The cumulative cases would have reached more than 420 million if no countermeasures had  
7  
8 been taken. On 29 May, there were 5,708,365 cases reported by WHO. The numbers of cases under  
9  
10 scenario 2 and 5 were far more than the actual reporting data, respectively, whereas that under scenario  
11  
12 3 were similar to the actual reporting data. The absolute number of cases in scenario 7 were far lower  
13  
14 than the actual reporting data.  
15  
16  
17

18  
19 Interventions implemented in China contributed to the significant decline in the cumulative number of  
20  
21 infections worldwide according to the scenario 3, 4, and 6 in comparison with no action taken at all. In  
22  
23 scenario 3, 98.62% of COVID-19 cases could have been avoided compared with the no-action baseline  
24  
25 scenario. Implementing travel restrictions against China alone (scenario 2) had little effect on the  
26  
27 controlling of global spread of COVID-19, as no substantial reduction in cases was observed. In scenario  
28  
29 5, implementing international travel restrictions could have only avoided 0.65% of number of infected  
30  
31 cases in comparison with the no-action baseline scenario. Figure 2-3 and Figure S1-5 showed the spatial  
32  
33 distribution of the cumulative number of infected cases over 150 days in each scenario.  
34  
35  
36  
37  
38  
39

## 40 **Discussion**

41  
42  
43 Our modelling results showed that COVID-19 transmission could be contained by timely and intensive  
44  
45 travel restrictions and public health countermeasures with multinational joint efforts, and consequently  
46  
47 the risk of becoming pandemic could perhaps be mitigated. Reduction in cumulative infections and local  
48  
49 transmissions of COVID-19, were somewhat attributed towards the aggregated public health  
50  
51 countermeasures, and to a much lesser extent, international travel restrictions.  
52  
53  
54

55  
56 Compared with previously reported number of COVID-19 cases,<sup>1</sup> those predicted under scenarios of  
57  
58 either imposing travel restrictions against China or implementing global travel restrictions were greater  
59  
60

1  
2  
3  
4 than the real-world observations. That is, these strategies appeared to be ineffective or somewhat  
5  
6 exaggerated. This finding indicated the intervention strategies implemented in China have played an  
7  
8 important role on the control of COVID-19 spread in communities. On 23 Jan, authorities in Wuhan have  
9  
10 taken a series of unprecedented COVID-19 countermeasures with millions of local residents strictly  
11  
12 upholding these policies, including city lockdown, traffic suspension, and quarantine.<sup>21</sup> Recent  
13  
14 epidemiological studies have demonstrated that these interventions have contributed to the interruption  
15  
16 of the spread of SARS-CoV-2 transmission,<sup>21,22</sup> which was consistent with our modelling analysis. The  
17  
18 decrease of daily COVID-19 infections in China has provided another set of evidence of the field  
19  
20 effectiveness of these public health countermeasures.<sup>23</sup>  
21  
22

23  
24  
25  
26  
27 Ideally, should most of the countries around the world have taken public health countermeasures  
28  
29 including stockpiling medical resources, initiating emergency response procedures, screening high-risk  
30  
31 population, and promoting social distancing at the beginning of the epidemic outbreak, the global spread  
32  
33 of COVID-19 could have been restricted to a much lesser extent around the world (scenario 7). However,  
34  
35 as of 29 May, there were 5,708,365 cases reported by WHO, greater than the simulated finding under  
36  
37 scenario of every member state taking precautionary countermeasures as early as January when city  
38  
39 quarantine in China has been initiated. Compared with what we assumed that the public health  
40  
41 countermeasures should have been carried out around the world from January 25, there was a 2-month  
42  
43 window period during which the global health communities did not effectively responded. European  
44  
45 countries began to implement a series of intervention strategies since mid-March, 2020.<sup>3</sup> The stay-at-  
46  
47 home order has been issued in the 42 states of United States in late March and early April.<sup>24</sup> Facing a  
48  
49 possible reemergence of COVID-19 later this year, any countermeasures that have been proved effective  
50  
51 in the field should have been implemented timely and strictly around the world.  
52  
53  
54  
55  
56  
57  
58  
59  
60

1  
2  
3  
4 The global travel restriction played a relatively modest preventive role on controlling the SARS-CoV-2  
5  
6 transmission in our analysis, which was consistent with previous studies.<sup>9,25</sup> While any global travel bans  
7  
8 could slow the rate of importing cases, but they cannot stop the spread of COVID-19 around the world.<sup>9</sup>  
9  
10 A systematic review of 23 studies has showed the travel restrictions were effective in delaying the  
11  
12 epidemic trajectory, but ineffective in stopping it.<sup>26</sup> Other concerns about the global travel restriction  
13  
14 strategy include its consequences of global economic issues as well as social dissatisfaction in relation  
15  
16 to human rights and discrimination.<sup>27</sup> Furthermore, one tradeoff of the global travel restrictions would  
17  
18 be related to a possible delay of appropriate responses in low-income countries because a large amount  
19  
20 of medical resources via air transportation from developed countries could have been blocked down.<sup>8</sup>  
21  
22 While the variation in effectiveness of partial or entire travel ban was under investigated,<sup>11 25</sup> our findings  
23  
24 suggest travel restriction a somewhat robust strategy during the outbreak. Additional efforts may invest  
25  
26 on screening and quarantining travelers from high-risk regions at the transportation interchange, and  
27  
28 remain social distancing strategies in the communities.  
29  
30  
31 Our study has some limitations. First, our analysis was limited to the study time. Our hypothetical  
32  
33 scenarios were based on counterfactual and backtrack the results to compare with the current situations.  
34  
35  
36 Second, we assumed aggregated strategies which could vary across different settings, and therefore result  
37  
38 should be interpreted with caution. Nonetheless, the rapid spread of this novel infectious diseases,  
39  
40 demonstrated adverse impact on the entire world with harms to the global health, economy, and social  
41  
42 governance. The COVID-19 pandemic has posed a major threat to our society, and no country could be  
43  
44 immune to such complex issues and stay out of the multinational collaborations. In the face of this global  
45  
46 challenge, the principle of one health and one world should be encouraged by all nations to, achieve  
47  
48 global governance in public health.  
49  
50  
51  
52  
53  
54  
55  
56  
57  
58  
59  
60

## Conclusion

Number of COVID-19 infected cases around the world could have been largely prevented by public health countermeasures in each country, and, to a lesser extent, by the global travel restriction. Rapid response to this novel public health challenge requires multi-national collaborations to carry out timely and intensive intervention strategies.

## Contributors

Conception and design of the work: WD, LCK, and YH; acquisition of data: LCK and YH; statistical analysis: LCK and YH; interpretation of data: WD, LCK, and YH; drafted the manuscript and revised: WD, LCK, YH, QW, YW, TY, XDC, HJ, and LJF. All authors revised the manuscript and read and approved the final version.

## Declaration of interests

We declare no competing interests.

## Funding

This study was supported by National Science and Technology Major Project of China [No. 2018ZX10713001], Jiangsu Provincial Major Science & Technology Demonstration Project [No. BE2017749], National Natural Science Foundation of China [Grant Number:41101431, 41531179,41421001, 41471377, 71704192] and Fundamental Research Funds for the Central Universities [No. 2017BD0094/9161017003].

## Data sharing

No additional data are available.

## Acknowledgments

We thank Prof Yilan Liao for her advice and critical comments.

### Ethics

Not applicable.

### Figure caption

Fig.1 The flowchart of transitions between compartments and movements between countries

Fig.2 Cumulative cases at days 150 in scenario 1

Fig.3 Cumulative cases at days 150 in scenario 7

### References

- 1 World Health Organization. Coronavirus disease 2019 (COVID-19) Dashboard. 2020. <https://covid19.who.int/> [Accessed October 18, 2020].
- 2 World Health Organization. Statement on the second meeting of the International Health Regulations (2005) Emergency Committee regarding the outbreak of novel coronavirus (2019-nCoV). January 30, 2020. Available at: [https://www.who.int/news-room/detail/30-01-2020-statement-on-the-second-meeting-of-the-international-health-regulations-\(2005\)-emergency-committee-regarding-the-outbreak-of-novel-coronavirus-\(2019-ncov\)](https://www.who.int/news-room/detail/30-01-2020-statement-on-the-second-meeting-of-the-international-health-regulations-(2005)-emergency-committee-regarding-the-outbreak-of-novel-coronavirus-(2019-ncov)) [Accessed January 31, 2020].
- 3 Flaxman S, Mishra S, Gandy A, et al. Estimating the effects of non-pharmaceutical interventions on COVID-19 in Europe. *Nature*. 2020;584(7820):257-261.
- 4 Lai S, Ruktanonchai NW, Zhou L, et al. Effect of non-pharmaceutical interventions to contain COVID-19 in China. *Nature*. 2020;585(7825):410-413.
- 5 World Health Organization. Updated WHO recommendations for international traffic in relation to COVID-19 outbreak. <https://www.who.int/news-room/articles-detail/updated-who-recommendations-for-international-traffic-in-relation-to-covid-19-outbreak> [Accessed 15 June 2020].

- 1  
2  
3  
4 6 World Health Organization. International Health Regulations, WHA 58.3, 2nd edn, World Health Organization,  
5  
6 Geneva (2005).  
7  
8  
9 7 World Health Organization Director-General's statement on IHR Emergency Committee on Novel  
10  
11 Coronavirus (2019-nCoV). [https://www.who.int/dg/speeches/detail/who-director-general-s-statement-on-ihr-](https://www.who.int/dg/speeches/detail/who-director-general-s-statement-on-ihr-emergency-committee-on-novel-coronavirus-(2019-nCoV))  
12  
13 [emergency-committee-on-novel-coronavirus-\(2019-nCoV\)](https://www.who.int/dg/speeches/detail/who-director-general-s-statement-on-ihr-emergency-committee-on-novel-coronavirus-(2019-nCoV)) (Jan 30, 2020) [Accessed 11th Feb, 2020].  
14  
15  
16  
17 8 Devi S. Travel restrictions hampering COVID-19 response. *Lancet*. 2020;395(10233):1331-1332.  
18  
19  
20 9 Wells CR, Sah P, Moghadas SM, et al. Impact of international travel and border control measures on the global  
21  
22 spread of the novel 2019 coronavirus outbreak. *Proc Natl Acad Sci U S A*. 2020;117(13):7504-7509.  
23  
24  
25 10 Anzai A, Kobayashi T, Linton NM, et al. Assessing the Impact of Reduced Travel on Exportation Dynamics  
26  
27 of Novel Coronavirus Infection (COVID-19). *J Clin Med*. 2020;9(2):601. Published 2020 Feb 24.  
28  
29  
30 11 Costantino V, Heslop DJ, MacIntyre CR. The effectiveness of full and partial travel bans against COVID-19  
31  
32 spread in Australia for travellers from China during and after the epidemic peak in China. *J Travel Med*.  
33  
34 2020;27(5):taaa081.  
35  
36  
37 12 Worldometer. Countries in the world by population (2020). [https://www.worldometers.info/world-](https://www.worldometers.info/world-population/population-by-country/)  
38  
39 [population/population-by-country/](https://www.worldometers.info/world-population/population-by-country/) [Accessed 14 June, 2020].  
40  
41  
42  
43 13 Openflights. Airport, airline and route data. <https://openflights.org/data.html> [Accessed 14 June, 2020].  
44  
45  
46 14 Widgren S, Eriksson R, Engblom S, Bauer P, Rosendal T, Chaos A. SimInf: A Framework for Data-Driven  
47  
48 Stochastic Disease Spread Simulations. Jun.18, 2020. <https://CRAN.R-project.org/package=SimInf> [Accessed  
49  
50 9 September, 2020].  
51  
52  
53 15 Widgren S, Bauer P, Eriksson R, Engblom S. SimInf: An R Package for Data-Driven Stochastic Disease  
54  
55 Spread Simulations. *J Stat Softw* 2019; 91(12): 42.  
56  
57  
58  
59  
60



- 1  
2  
3  
4 16 Backer J, Klinkenberg D, Wallinga J. Incubation period of 2019 novel coronavirus (2019-nCoV) infections  
5  
6 among travellers from Wuhan, China, 20–28 January 2020. *Eurosurveillance* 2020; 25.  
7  
8  
9 17 Kucharski AJ, Russell TW, Diamond C, et al. Early dynamics of transmission and control of COVID-19: a  
10  
11 mathematical modelling study. *Lancet Infect Dis.* 2020;20(5):553-558  
12  
13  
14 18 IATA. Travel news powered by IATA Timatic. April 1, 2020 2020.  
15  
16  
17 <https://www.iatatravelcentre.com/international-travel-document-news/1580226297.htm> [Accessed May 10,  
18  
19 2020].  
20  
21  
22 19 Tian H, Liu Y, Li Y, et al. An investigation of transmission control measures during the first 50 days of the  
23  
24 COVID-19 epidemic in China. *Science.* 2020;368(6491):638-642.  
25  
26  
27 20 Zhang J, Litvinova M, Liang Y, et al. Changes in contact patterns shape the dynamics of the COVID-19  
28  
29 outbreak in China. *Science.* 2020;368(6498):1481-1486.  
30  
31  
32 21 Pan A, Liu L, Wang C, et al. Association of Public Health Interventions With the Epidemiology of the COVID-  
33  
34 19 Outbreak in Wuhan, China. *JAMA* 2020; 323(19): 1-9.  
35  
36  
37 22 Zhang J, Litvinova M, Wang W, et al. Evolving epidemiology and transmission dynamics of coronavirus  
38  
39 disease 2019 outside Hubei province, China: a descriptive and modelling study. *Lancet Infect Dis.*  
40  
41 2020;20(7):793-802.  
42  
43  
44  
45 23 Johns Hopkins University. COVID-19 Dashboard (2020); <https://coronavirus.jhu.edu/map.html> [Accessed 14  
46  
47 June, 2020].  
48  
49  
50 24 Castillo RC, Staguhn ED, Weston-Farber E. The effect of state-level stay-at-home orders on COVID-19  
51  
52 infection rates. *Am J Infect Control.* 2020;48(8):958-960.  
53  
54  
55 25 Chinazzi M, Davis JT, Ajelli M, et al. The effect of travel restrictions on the spread of the 2019 novel  
56  
57 coronavirus (COVID-19) outbreak. *Science.* 2020;368(6489):395-400.  
58  
59  
60

- 1  
2  
3  
4 26 Mateus AL, Otete HE, Beck CR, Dolan GP, Nguyen-Van-Tam JS. Effectiveness of travel restrictions in the  
5  
6 rapid containment of human influenza: a systematic review. *Bulletin of the World Health Organization* 2014;  
7  
8 92: 868-80D.  
9  
10  
11  
12 27 von Tigerstrom B, Wilson K. COVID-19 travel restrictions and the International Health Regulations (2005).  
13  
14 *BMJ Glob Health*. 2020;5(5):e002629.  
15  
16  
17  
18  
19  
20  
21  
22  
23  
24  
25  
26  
27  
28  
29  
30  
31  
32  
33

Table 1. Assumed scenarios to simulate the spread of COVID-19\*

| Scenarios   | Descriptions                                                                                                    | Global travel |     |     | Public health   |     |    |
|-------------|-----------------------------------------------------------------------------------------------------------------|---------------|-----|-----|-----------------|-----|----|
|             |                                                                                                                 | restrictions  |     |     | countermeasures |     |    |
|             |                                                                                                                 | A             | B   | C   | D               | E   | F  |
| 1(baseline) | None countermeasures                                                                                            | No            | No  | No  | No              | No  | No |
| 2           | Travel restrictions imposed on China from February 1                                                            | No            | Yes | No  | No              | No  | No |
| 3           | Public health countermeasures in China from January 25                                                          | No            | No  | No  | No              | Yes | No |
| 4           | Travel restrictions imposed on China from February 1,<br>Public health countermeasures in China from January 25 | No            | Yes | No  | No              | Yes | No |
| 5           | Travel restrictions imposed on China from February 1,<br>global travel restrictions implemented from March 20   | No            | Yes | Yes | No              | No  | No |

|   |                                                                                                                                                                                                      |    |     |     |    |     |     |
|---|------------------------------------------------------------------------------------------------------------------------------------------------------------------------------------------------------|----|-----|-----|----|-----|-----|
| 6 | Travel restrictions imposed on China from February 1,<br>global travel restrictions implemented from March 20<br>Public health countermeasures in China from January 25                              | No | Yes | Yes | No | Yes | No  |
| 7 | Travel restrictions imposed on China from February 1,<br>global travel restrictions implemented from March 20,<br>Public health countermeasures in China and all around the<br>world from January 25 | No | Yes | Yes | No | Yes | Yes |

\* A: none, B: travel restrictions against China, C: global travel restrictions, D: none, E: public health countermeasures in China,

F: global public health countermeasures

Table 2. Results for the run with median of the total cumulative number of infections.

| Scenarios   | Median of<br>cumulative<br>infections at 150<br>days | Avoided median number of<br>cases** | Reducing the estimated<br>median number of infections<br>(%) |
|-------------|------------------------------------------------------|-------------------------------------|--------------------------------------------------------------|
| 1(baseline) | 420,520,763                                          | -                                   | -                                                            |
| 2           | 385,399,261                                          | 35,121,502                          | 8.35                                                         |
| 3           | 5,809,925                                            | 414,710,838                         | 98.62                                                        |
| 4           | 4,832,306                                            | 415,688,457                         | 98.85                                                        |

|                          |             |             |        |
|--------------------------|-------------|-------------|--------|
| 5                        | 417,781,694 | 2,739,069   | 0.65   |
| 6                        | 5,270,174   | 415,250,589 | 98.75  |
| 7                        | 133,575     | 420,387,188 | 99.97  |
| <b>Actual reporting*</b> | 5,708,365   | 414,812,398 | 98.64% |

\*Number of confirmed cases were derived from WHO data reported on May 29, 2020 (150th day since January 1, 2020)

\*\* Compared with infections in baseline 1

1  
2  
3  
4  
5  
6  
7  
8  
9  
10  
11  
12  
13  
14  
15  
16  
17  
18  
19  
20  
21  
22  
23  
24  
25  
26  
27  
28  
29  
30  
31  
32  
33  
34  
35  
36  
37  
38  
39  
40  
41  
42  
43  
44  
45  
46  
47  
48  
49  
50  
51  
52  
53  
54  
55  
56  
57  
58  
59  
60

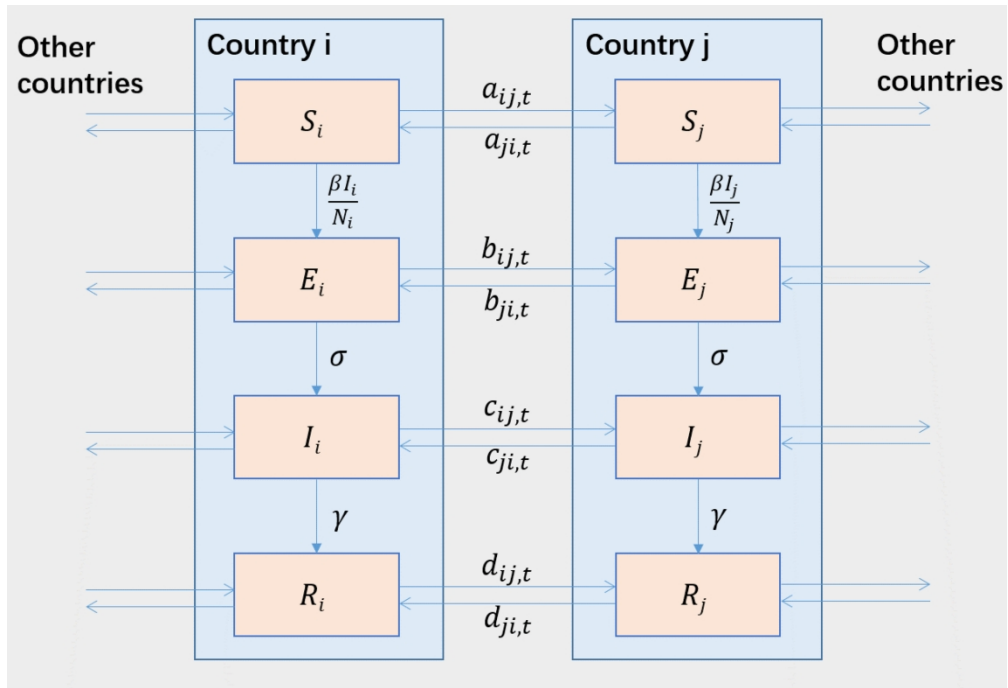

Fig.1 The flowchart of transitions between compartments and movements between countries

210x144mm (300 x 300 DPI)

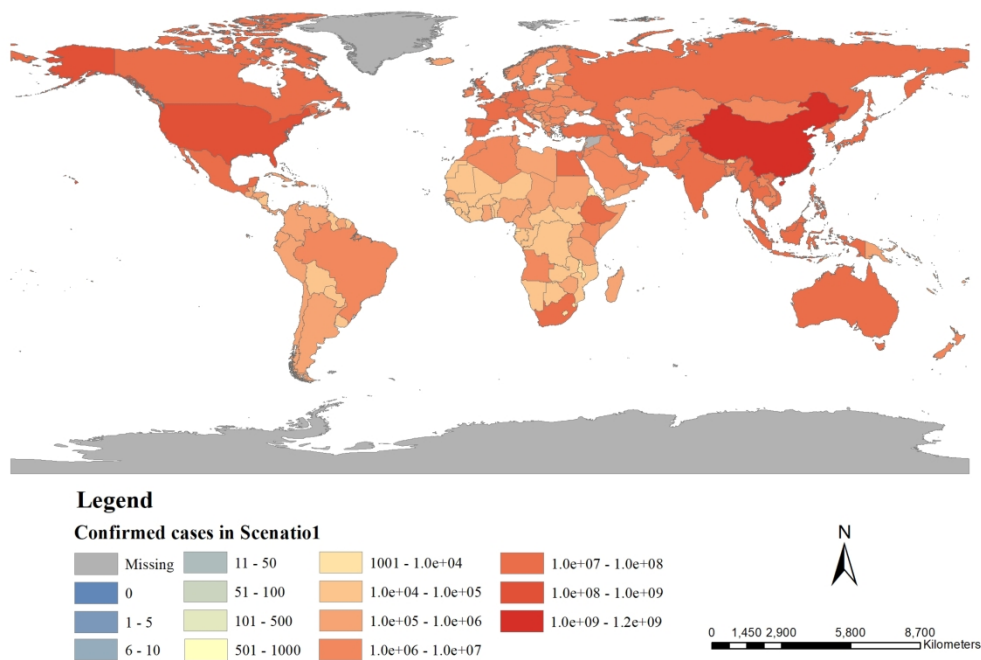

Fig.2 Cumulative cases at days 150 in scenario 1

288x202mm (300 x 300 DPI)

1  
2  
3  
4  
5  
6  
7  
8  
9  
10  
11  
12  
13  
14  
15  
16  
17  
18  
19  
20  
21  
22  
23  
24  
25  
26  
27  
28  
29  
30  
31  
32  
33  
34  
35  
36  
37  
38  
39  
40  
41  
42  
43  
44  
45  
46  
47  
48  
49  
50  
51  
52  
53  
54  
55  
56  
57  
58  
59  
60

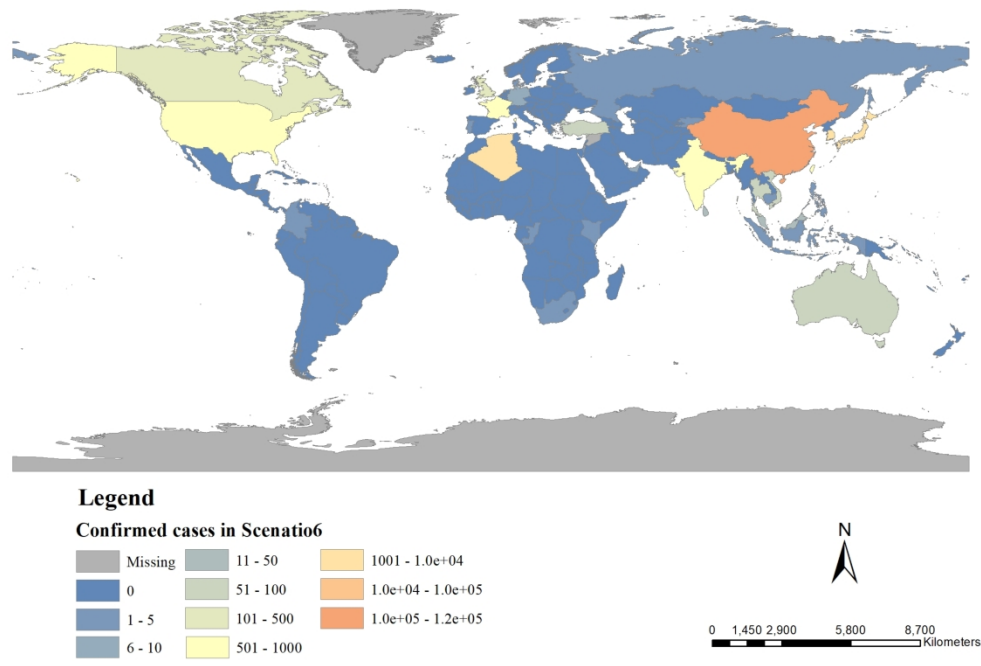

Fig.3 Cumulative cases at days 150 in scenario 7

288x202mm (300 x 300 DPI)

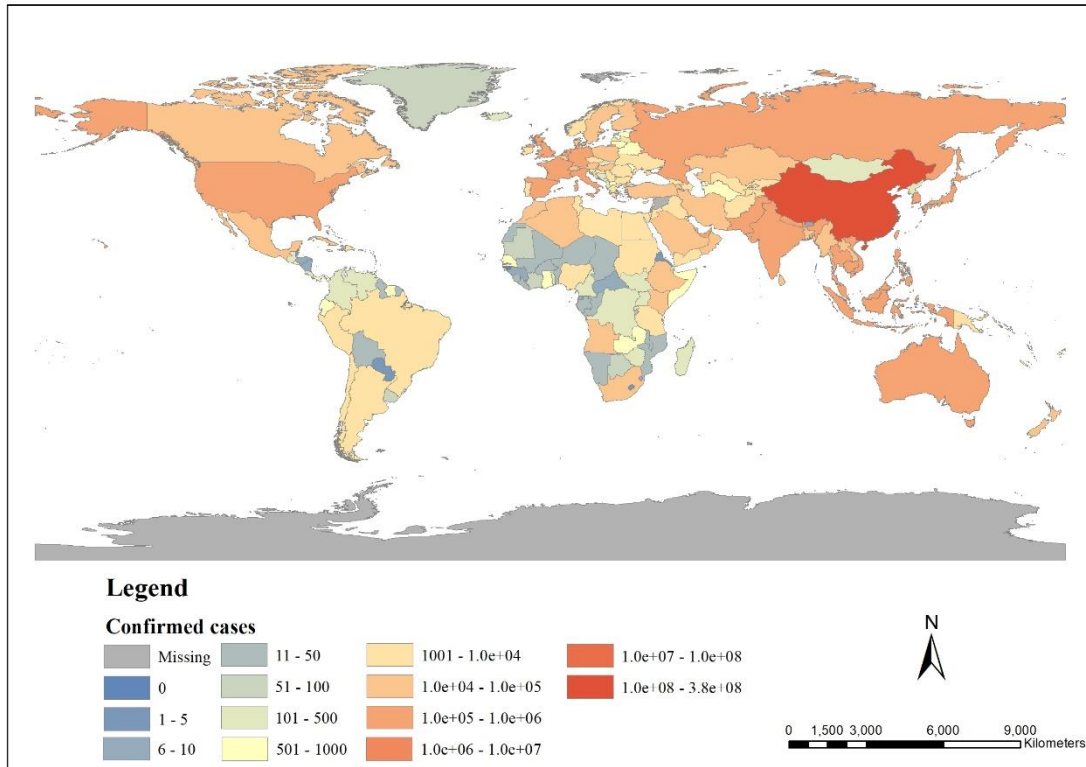

Fig.S1 Cumulative cases at days 150 in scenario 2.



1  
2  
3  
4  
5  
6  
7  
8  
9  
10  
11  
12  
13  
14  
15  
16  
17  
18  
19  
20  
21  
22  
23  
24  
25  
26  
27  
28  
29  
30  
31  
32  
33  
34  
35  
36  
37  
38  
39  
40  
41  
42  
43  
44  
45  
46  
47  
48  
49  
50  
51  
52  
53  
54  
55  
56  
57  
58  
59  
60

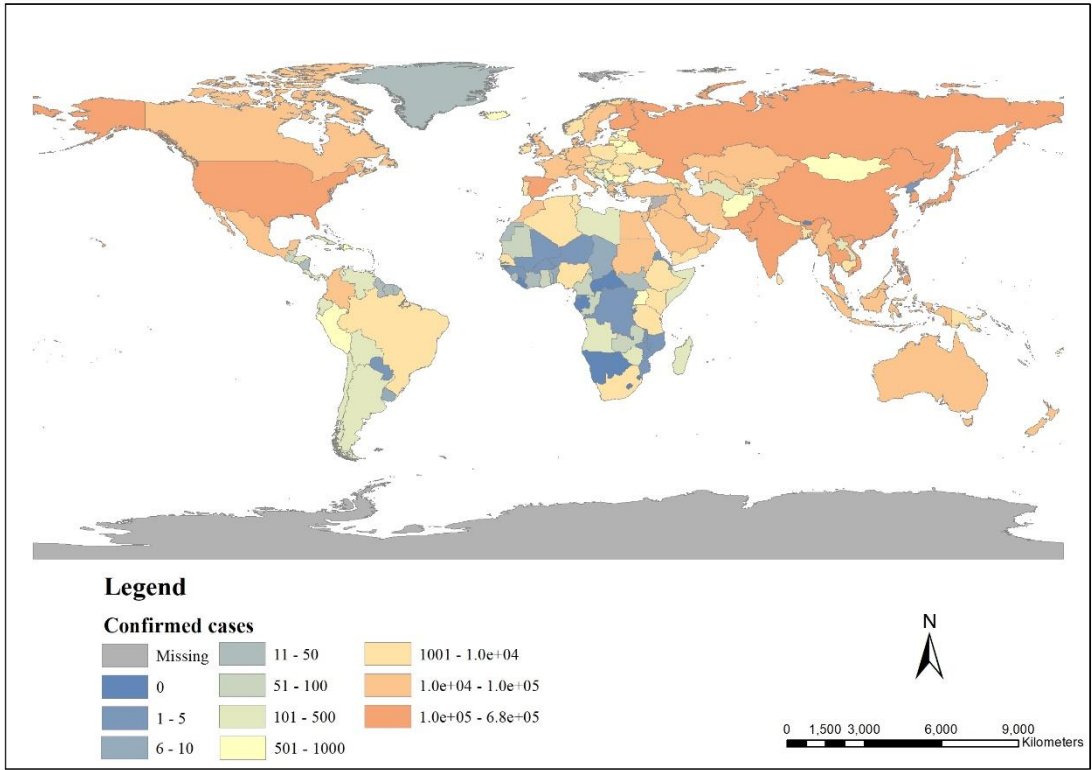

Fig.S2 Cumulative cases at days 150 in scenario 3.

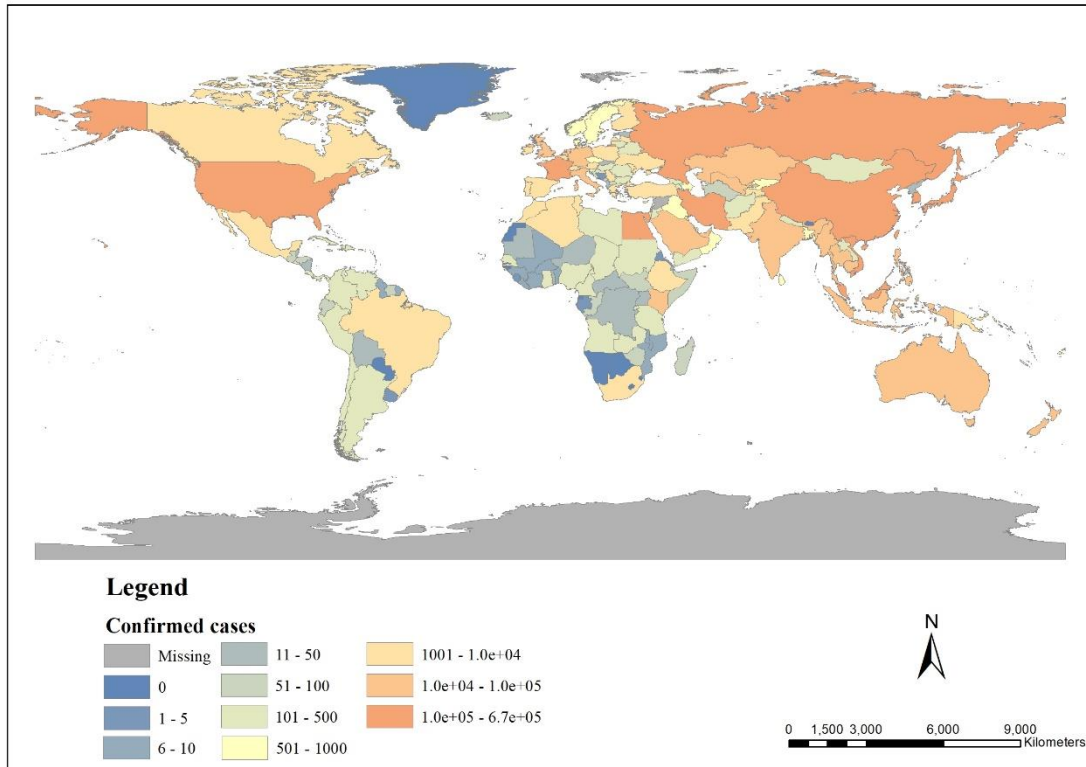

Fig.S3 Cumulative cases at days 150 in scenario 4.

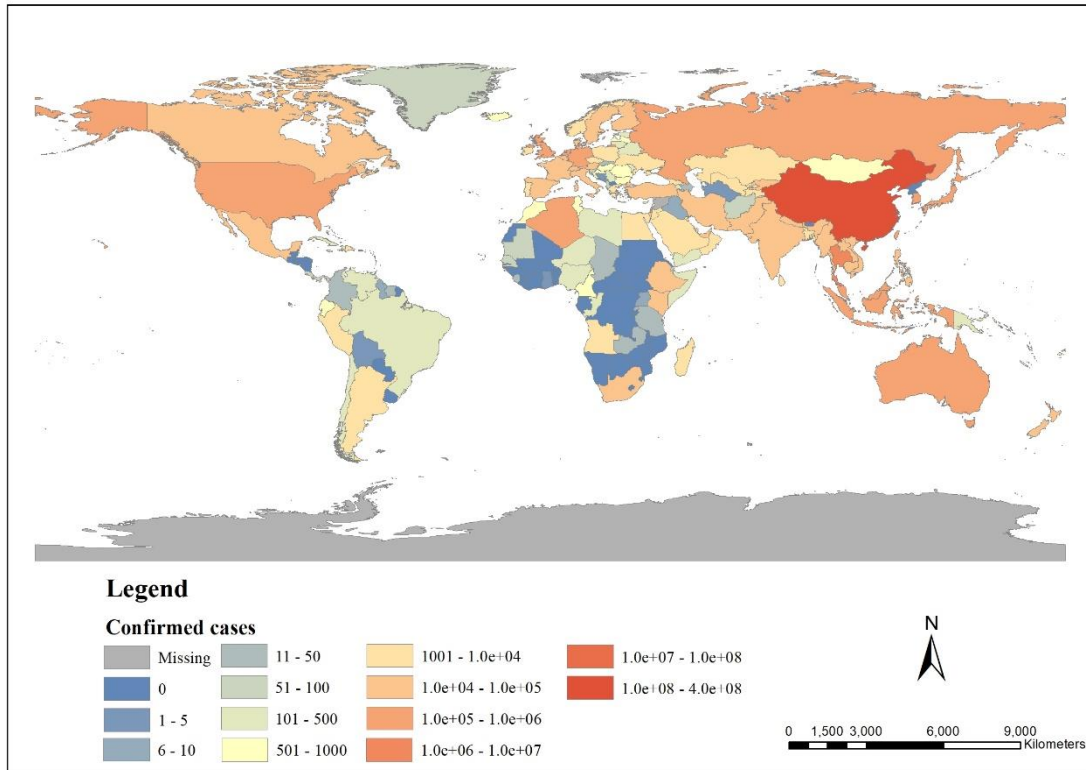

Fig.S4 Cumulative cases at days 150 in scenario 5.

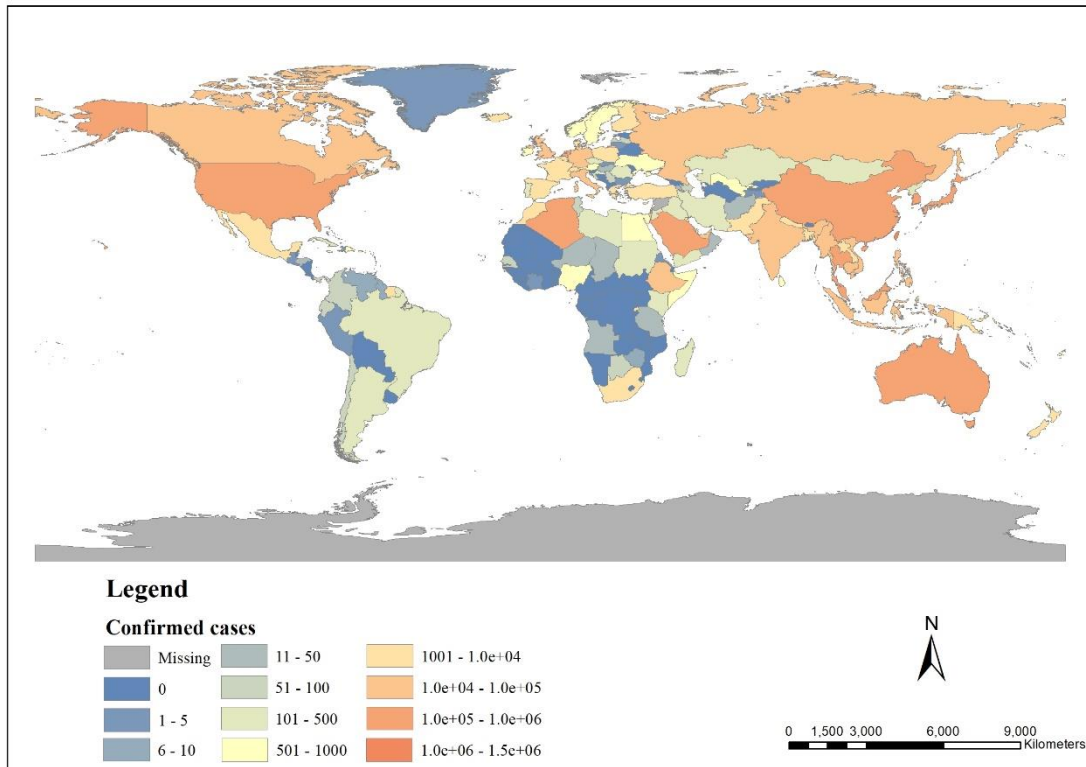

Fig.S5 Cumulative cases at days 150 in scenario 6.

# BMJ Open

## Could COVID-19 Pandemic be Stopped with Joint Efforts of Travel Restrictions and Public Health Countermeasures: a modelling study

|                                 |                                                                                                                                                                                                                                                                                                                                                                                                                                                                                                                                                                                                                                                                                                                         |
|---------------------------------|-------------------------------------------------------------------------------------------------------------------------------------------------------------------------------------------------------------------------------------------------------------------------------------------------------------------------------------------------------------------------------------------------------------------------------------------------------------------------------------------------------------------------------------------------------------------------------------------------------------------------------------------------------------------------------------------------------------------------|
| Journal:                        | <i>BMJ Open</i>                                                                                                                                                                                                                                                                                                                                                                                                                                                                                                                                                                                                                                                                                                         |
| Manuscript ID                   | bmjopen-2020-046157.R1                                                                                                                                                                                                                                                                                                                                                                                                                                                                                                                                                                                                                                                                                                  |
| Article Type:                   | Original research                                                                                                                                                                                                                                                                                                                                                                                                                                                                                                                                                                                                                                                                                                       |
| Date Submitted by the Author:   | 19-Jan-2021                                                                                                                                                                                                                                                                                                                                                                                                                                                                                                                                                                                                                                                                                                             |
| Complete List of Authors:       | Kong, Lingcai; North China Electric Power University, Mathematics and Physics<br>Hu, Yi; Fudan University, Epidemiology and Biostatistics<br>Wang, Qiang; Southeast University, Key Laboratory of Environmental Medicine Engineering<br>Chen, Xinda; North China Electric Power University, Mathematics and Physics<br>Yao, Tong; North China Electric Power University, Mathematics and Physics<br>Wang, Yu; Peking University, Global Health<br>Jin, Hui; Southeast University, Key Laboratory of Environmental Medicine Engineering<br>Fan, Lijun; Southeast University, Key Laboratory of Environmental Medicine Engineering<br>Du, Wei; Southeast University, Key Laboratory of Environmental Medicine Engineering |
| <b>Primary Subject Heading</b>: | Infectious diseases                                                                                                                                                                                                                                                                                                                                                                                                                                                                                                                                                                                                                                                                                                     |
| Secondary Subject Heading:      | Global health                                                                                                                                                                                                                                                                                                                                                                                                                                                                                                                                                                                                                                                                                                           |
| Keywords:                       | Public health < INFECTIOUS DISEASES, COVID-19, International health services < HEALTH SERVICES ADMINISTRATION & MANAGEMENT                                                                                                                                                                                                                                                                                                                                                                                                                                                                                                                                                                                              |
|                                 |                                                                                                                                                                                                                                                                                                                                                                                                                                                                                                                                                                                                                                                                                                                         |

SCHOLARONE™  
Manuscripts

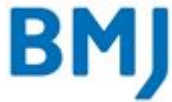

I, the Submitting Author has the right to grant and does grant on behalf of all authors of the Work (as defined in the below author licence), an exclusive licence and/or a non-exclusive licence for contributions from authors who are: i) UK Crown employees; ii) where BMJ has agreed a CC-BY licence shall apply, and/or iii) in accordance with the terms applicable for US Federal Government officers or employees acting as part of their official duties; on a worldwide, perpetual, irrevocable, royalty-free basis to BMJ Publishing Group Ltd ("BMJ") its licensees and where the relevant Journal is co-owned by BMJ to the co-owners of the Journal, to publish the Work in this journal and any other BMJ products and to exploit all rights, as set out in our [licence](#).

The Submitting Author accepts and understands that any supply made under these terms is made by BMJ to the Submitting Author unless you are acting as an employee on behalf of your employer or a postgraduate student of an affiliated institution which is paying any applicable article publishing charge ("APC") for Open Access articles. Where the Submitting Author wishes to make the Work available on an Open Access basis (and intends to pay the relevant APC), the terms of reuse of such Open Access shall be governed by a Creative Commons licence – details of these licences and which [Creative Commons](#) licence will apply to this Work are set out in our licence referred to above.

Other than as permitted in any relevant BMJ Author's Self Archiving Policies, I confirm this Work has not been accepted for publication elsewhere, is not being considered for publication elsewhere and does not duplicate material already published. I confirm all authors consent to publication of this Work and authorise the granting of this licence.

1  
2  
3  
4 **Could COVID-19 Pandemic be Stopped with Joint Efforts of Travel Restrictions**  
5  
6 **and Public Health Countermeasures: a modelling study**  
7  
8  
9

10  
11 **Author names**  
12

13  
14 Lingcai Kong<sup>1\*</sup>, Yi Hu<sup>2\*</sup>, Qiang Wang<sup>3</sup>, XinDa Chen<sup>1</sup>, Tong Yao<sup>1</sup>, Yu Wang<sup>4</sup>, Hui Jin<sup>3</sup>,

15  
16  
17 Lijun Fan<sup>3</sup>, Wei Du<sup>3</sup>  
18

19  
20 <sup>1</sup> Department of Mathematics and Physics, North China Electric Power University, Baoding

21  
22 071003, China;  
23

24  
25 <sup>2</sup> Department of Epidemiology and Biostatistics, School of Public Health, Fudan University,

26  
27 Shanghai 200032, China;  
28

29  
30 <sup>3</sup> Key Laboratory of Environmental Medicine Engineering, Ministry of Education, School of

31  
32 Public Health, Southeast University, Nanjing 210009, Jiangsu, China;  
33

34  
35 <sup>4</sup> Department of Global Health, School of Public Health, Peking University, Beijing 100191,

36  
37 China  
38

39  
40  
41  
42  
43 \* LK and YH contributed equally to the manuscript.  
44  
45  
46  
47

48 Corresponding author:  
49

50 Wei Du, Key Laboratory of Environmental Medicine Engineering, Ministry of Education,

51  
52 School of Public Health, Southeast University, Nanjing 210009, Jiangsu, China. Email:

53  
54  
55 duwei@seu.edu.cn. Tel: +86 (25) 8327 2303  
56  
57  
58  
59  
60

## Abstract

**Objective:** We aim to explore and compare the effect of global travel restrictions and public health countermeasures in response to COVID-19 outbreak.

**Design:** A data-driven spatio-temporal modeling to simulate the spread of COVID-19 worldwide for 150 days since January 1, 2020 under different scenarios.

**Setting:** Worldwide.

**Interventions:** Travel restrictions and public health countermeasures.

**Main outcome:** The cumulative number of COVID-19 cases.

**Results:** The cumulative number of COVID-19 cases could reach more than 420 million around the world without any countermeasures taken. Under timely and intensive global interventions, 99.97% of infections could be avoided comparing with non-interventions. The scenario of carrying out domestic travel restriction and public health countermeasures in China-only could contribute to a significant decrease of the cumulative number of infected cases worldwide. Without global travel restriction in the study setting, 98.62% of COVID-19 cases could be avoided by public health countermeasures in China-only compared with non-interventions at all.

**Conclusions:** Public health countermeasures were generally more effective than travel restrictions in many countries, suggesting multi-national collaborations in the public health communities in response to this novel global health challenge.

**Keywords:** COVID-19, Travel Restrictions, Countermeasures, public health

### Strengths and limitations of this study

- Under timely and intensive global interventions in the study setting, 99.97% of infections could be avoided comparing with non-interventions.



- The scenario of carrying out domestic travel restriction and public health countermeasures in China-only could contribute to a significant decrease of the cumulative number of infected cases worldwide.
- Public health countermeasures were generally more effective than travel restrictions in many countries, suggesting multi-national collaborations in the public health communities in response to this novel global health challenge.
- The analysis was limited to the study time. Our hypothetical scenarios were based on counterfactual and backtrack the results to compare with the current situations.

## Introduction

Novel infectious diseases appear to be emerging faster now than ever before, possibly driven by the systematic manipulation of nature by humans, not only through a variety of factors, including population growth, cross-species interactions, climate change, and international travel and trade, yet also through weakening of natural barriers to disease emergence and persistence. Globally, as at October 18 2020, a total of 39,442,444 peoples have been confirmed COVID-19 cases, including 1,039,406 deaths, reported by the World Health Organization (WHO).<sup>1</sup> WHO declared COVID-19 a Public Health Emergency of International Concern on 30 January 2020<sup>2</sup> and then a pandemic on 9 March, and called on Member States to respond to the COVID-19 pandemic by implementing nation-wide COVID-19 countermeasure strategies.

In the absence of effective drugs and vaccines, non-pharmaceutical interventions were effective in controlling the SARS-CoV-2 transmission in different populations.<sup>3 4</sup> A series of social distancing countermeasures including school closures and restriction on mass gathering were implemented to minimize risk of spread between humans. Travel restrictions were enforced by several countries to

1  
2  
3  
4 uphold boarder security and shut down the transmission passage from any imported infected cases. The  
5  
6 decline of COVID-19 cases in China showed the effectiveness of non-pharmaceutical public health  
7  
8 interventions, with their implementation exceptionally stringent as compared to most other countries.<sup>5</sup>  
9  
10  
11 However, over the past eight months, the number of cases reported has increased rapidly without showing  
12  
13 signs of decay around the world. Selection and implementation of intervention strategies appeared to be  
14  
15 different across countries and regions in their responses to the early sign of disease spread, which could  
16  
17 explain in part the current COVID-19 pandemic.  
18  
19

20  
21  
22 In February and March, WHO did not recommend imposing travel or trade restrictions on countries  
23  
24 experiencing COVID-19 outbreaks.<sup>6</sup> The International Health Regulations (2005) (IHR) formulated the  
25  
26 global joint response to the disease in order to avoid unnecessary international traffic and trade  
27  
28 restrictions.<sup>7</sup> WHO commented that travel and trade restrictions would cause more harm than good.<sup>8</sup>  
29  
30 More than 130 countries have implemented different forms of travel restrictions, including suspensions  
31  
32 of flights, halting visa-on-arrival programs, discouraging travel to and from high-risk areas, and closing  
33  
34 boarders for foreigners.<sup>9</sup> Recently, a few reports explored the effectiveness of travel restrictions on  
35  
36 COVID-19 in different countries.<sup>10 11</sup> To some extent, travel restrictions avoided the importation of  
37  
38 infected cases by breaking the chains of transmission between different locations, however the  
39  
40 containment effect on COVID-19 pandemic was unknown. Nonetheless, an Australian study showed the  
41  
42 travel restrictions to and from China were somewhat effective on containing the COVID-19 spread.<sup>12</sup>  
43  
44  
45  
46  
47  
48  
49

50  
51 The purpose of this study was to compare the current situations with our assumed scenarios under  
52  
53 different intervention strategies to explore the effectiveness of different interventions in containing the  
54  
55 COVID-19 transmission. Findings may support local decision makers to select intervention strategies  
56  
57  
58  
59  
60

1  
2  
3  
4 particularly in relation to travel restrictions to prevent, contain, and manage COVID-19 spread in the  
5  
6 nearer future.  
7

## 8 9 **Methods**

### 10 11 **Data sources**

12  
13 Size of population by country were obtained from Worldometer.<sup>13</sup> Air flights data were obtained from  
14  
15 the OpenFlights databases,<sup>14</sup> which contains information of 7698 airports and 67,663 domestic and  
16  
17 international routes and other related data. International routes were aggregated to the country level.  
18  
19 Although number of travelers would most accurately reflect the population mobility, this exact  
20  
21 information was not available; hence, we used the aircraft seating capacity as the best available proxy  
22  
23 measure for analysis relating to number of travelers.  
24  
25  
26  
27  
28

29  
30 Information on travel restrictions against China was obtained from the National Immigration  
31  
32 Administration (<https://www.nia.gov.cn/>), and complemented with information from the council on  
33  
34 foreign relations (<https://www.thinkglobalhealth.org/article/travel-restrictions-china-due-covid-19>).

35  
36 Other travel restriction information was obtained from the International Air Transport Association (IATA)  
37  
38 updated on 1 April 2020 ([www.iatatravelcentre.com/international-travel-document-news](http://www.iatatravelcentre.com/international-travel-document-news)).

### 39 40 41 42 **Epidemic simulation model**

43  
44 We employed the SimInf R package to implement the COVID-19 spatio-temporal modelling.<sup>15 16</sup> The  
45  
46 model comprised multiple nodes and each node, representing one country, contained the susceptible (S),  
47  
48 Exposed (E), infected (I) and Removed (R) compartments. Transitions between these compartments were  
49  
50 modelled as a continuous-time discrete state Markov chain (CTMC). Individuals' movements across  
51  
52 different countries, which were estimated by the aircraft seating capacity as the proxy for number of  
53  
54 travelers, were processed with scheduled events, causing the change of the population in each country.  
55  
56  
57  
58  
59  
60

1  
2  
3  
4 We only considered the movement of individuals in one country to a destination country, irrespective of  
5  
6 the birth or death. The scheduled movements were carried on when the simulation in continuous time  
7  
8 reaches the pre-defined time. The individuals were randomly sampled from the compartments affected  
9  
10 by the event. At time  $t$ , there were  $a_{ij,t}$  susceptible individuals moved from node  $i$  to  $j$ , while  $a_{ji,t}$   
11  
12 susceptible individuals moved from  $j$  to  $i$ . The number of Exposed, Infected and Removed individuals  
13  
14 travelled from country  $i$  to  $j$  were noted by  $b_{ij,t}$ ,  $c_{ij,t}$  and  $d_{ij,t}$ , respectively. Transitions between  
15  
16 compartments in one country and the movements between different countries were illustrated by Figure  
17  
18 1. The number of individuals' movements across countries were estimated to represent different  
19  
20 scenarios. We implemented a classic SEIR transmission model to simulate the spread of COVID-19. For  
21  
22 simplicity, we presented the deterministic version of the transmission model in each country, described  
23  
24 by the following set of differential equations:

$$\begin{aligned} \frac{dS}{dt} &= -\frac{\beta SI}{N} \\ \frac{dE}{dt} &= \frac{\beta SI}{N} - \sigma E \\ \frac{dI}{dt} &= \sigma E - \gamma I \\ \frac{dR}{dt} &= \gamma I \end{aligned}$$

25  
26 where  $1/\sigma$  is the latent period with value of 6.4 days, and  $1/\gamma$  is the recovery period with value of  
27  
28 days.<sup>17 18</sup> In our model, we set the reproductive number,  $R_0 = 2.35$ , corresponding to the effective  
29  
30 contact rate  $\beta = 0.8103$ .<sup>18</sup>

31  
32 We assumed 10 initial infectious cases of COVID-19 identified from Wuhan city of China. The number  
33  
34 of susceptible individuals were set to the size of population in each country, while the number of exposed  
35  
36 and recovered were all set to zero. We ran the models for 150 days and used the cumulative number of  
37  
38 infections to investigate the influence of travel restrictions and public health countermeasures including  
39  
40  
41  
42  
43  
44  
45  
46  
47  
48  
49  
50  
51  
52  
53  
54  
55  
56  
57  
58  
59  
60

1  
2  
3  
4 social distancing, isolation of cases, quarantine of close contacts, etc., during the global spread of  
5  
6 COVID-19. The first day of the simulation was set on 1 January, 2020.  
7  
8

### 9 **Modelling scenarios**

10  
11 Seven scenarios were modelled to simulate the spread of COVID-19 around the world (Table 1). The  
12  
13 baseline scenario for comparison was set assuming neither travel restrictions nor public health  
14  
15 countermeasures. Additional six scenarios were then modelled assuming different combination of travel  
16  
17 restrictions and public health countermeasures.  
18  
19

20  
21 We separated global travel restrictions into three situations, i.e., none, travel restrictions against China,  
22  
23 or multinational travel restrictions. After WHO declared COVID 19 a Public Health Emergency of  
24  
25 International Concern, many countries imposed travel restrictions against China, most of which were  
26  
27 effective on 1 February, 2020. Since March 2020, COVID-19 has spread around almost everywhere in  
28  
29 the world. Responsive to this pandemic, country-wide travel bans were implemented strictly worldwide.  
30  
31 We collected the information on multinational travel bans from IATA <sup>19</sup>(updated on 1 April, 2020), from  
32  
33 which we assumed global travel restrictions were carried out on 20 March, 2020.  
34  
35

36  
37 We separated the public health countermeasures into three situations, i.e., none, public health  
38  
39 countermeasures implemented in China, or global public health countermeasures implemented  
40  
41 worldwide. In the study, public health countermeasures represented a series of activities reducing  
42  
43 effective contact rate between humans. These activities included isolating confirmed cases, quarantining  
44  
45 close contacts, suspending public transports, closing schools and entertainment venues, and banning  
46  
47 public gatherings.<sup>20</sup> These public health countermeasures have been put in place to stop transmission of  
48  
49 COVID-19 since late January 2020, which demonstrated a reduced daily contact by most, during the  
50  
51 COVID-19 social distancing period, with most human interactions restricted to be held within each  
52  
53  
54  
55  
56  
57  
58  
59  
60

1  
2  
3  
4 household.<sup>21</sup> We assumed the global public health countermeasures were implemented in a less strict  
5  
6 way than those in China. Therefore, for public health countermeasures implemented in China, we set the  
7  
8 effective contact rate in China reducing 85% after 24 Jan, 2020, whereas for global public health  
9  
10 countermeasures, we set the effective contact rate among other countries reducing 50% from 25 Jan,  
11  
12  
13  
14 2020.

### 17 **Patient and Public Involvement statement**

18  
19 Patients and the public were not involved in this study.

### 22 **Results**

23  
24 Table 2 presented the median estimates of the total cumulative number of infections worldwide for each  
25  
26 scenario. The cumulative cases would have reached more than 420 million if no countermeasures had  
27  
28 been taken. On 29 May, there were 5,708,365 cases reported by WHO. The numbers of cases under  
29  
30 scenario 2 and 5 were far more than the actual reporting data, respectively, whereas that under scenario  
31  
32 3 were similar to the actual reporting data. The absolute number of cases in scenario 7 were far lower  
33  
34 than the actual reporting data.

35  
36 Interventions implemented in China contributed to the significant decline in the cumulative number of  
37  
38 infections worldwide according to the scenario 3, 4, and 6 in comparison with no action taken at all. In  
39  
40 scenario 3, 98.62% of COVID-19 cases could have been avoided compared with the no-action baseline  
41  
42 scenario. Implementing travel restrictions against China alone (scenario 2) had little effect on the  
43  
44 controlling of global spread of COVID-19, as no substantial reduction in cases was observed. In scenario  
45  
46 5, implementing international travel restrictions could have only avoided 0.65% of number of infected  
47  
48 cases in comparison with the no-action baseline scenario. Figure 2-3 and Figure S1-5 showed the spatial  
49  
50 distribution of the cumulative number of infected cases over 150 days in each scenario.  
51  
52  
53  
54  
55  
56  
57  
58  
59  
60

## Discussion

Our modelling results showed that COVID-19 transmission could be contained by timely and intensive travel restrictions and public health countermeasures with multinational joint efforts at the early stage of spread, and consequently the risk of becoming pandemic could perhaps be mitigated. Haug et al. quantified the change of  $R_t$  (i.e., the effective reproduction number of COVID-19) in relation to different adoption time of non-pharmaceutical interventions, and reported that the earlier adoptions were associated with more benefits.<sup>22</sup> China's rapid responses to the COVID-19 spread also demonstrated a successful case in the real world.<sup>5</sup> While the spread of the pandemic follows an exponential pattern during the initial growth phase, it is particularly important to uptake the effective intervention strategies as early as possible, especially when facing the COVID-19 resurgence spread.

Reduction in cumulative infections and local transmissions of COVID-19, were somewhat attributed towards the aggregated public health countermeasures, and to a much lesser extent, international travel restrictions, which was consistent with previous studies using a similar analytic approach. Chinazzi et al reported impose travel restrictions on mainland China had a modest effect on the epidemic trajectory.<sup>23</sup>

Wells et al showed that the travel restrictions as well as airport screening enforced in China and other countries were insufficient to contain the COVID-19 spread around the world.<sup>10</sup> Russell et al found that in general stringent travel restrictions might have little impact on the epidemic dynamics.<sup>24</sup> Given several factors including complex human behaviors that could determine the spread of the current pandemic, lessons learnt from China's experience could be informative to initiate multiple public health countermeasures such as the grid-network of community-based health checkpoints,<sup>5</sup> when facing a COVID-19 resurgence spread at present. Our study findings emphasized again the importance of carrying out collaborative public health countermeasures rather than simply placing travel restrictions.

1  
2  
3  
4 Compared with previously reported number of COVID-19 cases,<sup>1</sup> those predicted under scenarios of  
5  
6 either imposing travel restrictions against China or implementing global travel restrictions were greater  
7  
8 than the real-world observations. That is, these strategies appeared to be ineffective or somewhat  
9  
10 exaggerated. This finding indicated the intervention strategies implemented in China have played an  
11  
12 important role on the control of COVID-19 spread in communities. On 23 Jan, authorities in Wuhan have  
13  
14 taken a series of unprecedented COVID-19 countermeasures with millions of local residents strictly  
15  
16 upholding these policies, including city lockdown, traffic suspension, and quarantine.<sup>25</sup> Recent  
17  
18 epidemiological studies have demonstrated that these interventions have contributed to the interruption  
19  
20 of the spread of SARS-CoV-2 transmission,<sup>25,26</sup> which was consistent with our modelling analysis. The  
21  
22 decrease of daily COVID-19 infections in China has provided another set of evidence of the field  
23  
24 effectiveness of these public health countermeasures.<sup>5</sup>

25  
26  
27 Ideally, should most of the countries around the world have taken public health countermeasures  
28  
29 including stockpiling medical resources, initiating emergency response procedures, screening high-risk  
30  
31 population, and promoting social distancing at the beginning of the epidemic outbreak, the global spread  
32  
33 of COVID-19 could have been restricted to a much lesser extent around the world (scenario 7). However,  
34  
35 as of 29 May, there were 5,708,365 cases reported by WHO, greater than the simulated finding under  
36  
37 scenario of every member state taking precautionary countermeasures as early as January when city  
38  
39 quarantine in China has been initiated. Compared with what we assumed that the public health  
40  
41 countermeasures should have been carried out around the world from January 25, there was a 2-month  
42  
43 window period during which the global health communities did not effectively responded. European  
44  
45 countries began to implement a series of intervention strategies since mid-March, 2020.<sup>3</sup> The stay-at-  
46  
47 home order has been issued in the 42 states of United States in late March and early April.<sup>27</sup> Facing a  
48  
49  
50  
51  
52  
53  
54  
55  
56  
57  
58  
59  
60



1  
2  
3  
4 possible reemergence of COVID-19 later this year, any countermeasures that have been proved effective  
5  
6 in the field should have been implemented timely and strictly around the world.  
7  
8

9 The global travel restriction played a relatively modest preventive role on controlling the SARS-CoV-2  
10  
11 transmission in our analysis, which was consistent with previous studies.<sup>10,28</sup> While any global travel  
12  
13 bans could slow the rate of importing cases, but they cannot stop the spread of COVID-19 around the  
14  
15 world.<sup>10</sup> A systematic review of 23 studies has showed the travel restrictions were effective in delaying  
16  
17 the epidemic trajectory, but ineffective in stopping it.<sup>29</sup> Other concerns about the global travel restriction  
18  
19 strategy include its consequences of global economic issues as well as social dissatisfaction in relation  
20  
21 to human rights and discrimination.<sup>30</sup> Furthermore, one tradeoff of the global travel restrictions would  
22  
23 be related to a possible delay of appropriate responses in low-income countries because a large amount  
24  
25 of medical resources via air transportation from developed countries could have been blocked down.<sup>9</sup>  
26  
27 While the variation in effectiveness of partial or entire travel ban was under investigated,<sup>12,28</sup> our findings  
28  
29 suggest travel restriction a somewhat robust strategy during the outbreak. Additional efforts may invest  
30  
31 on screening and quarantining travelers from high-risk regions at the transportation interchange, and  
32  
33 remain social distancing strategies in the communities.  
34  
35  
36  
37  
38  
39  
40  
41  
42

43 Our study has some limitations. First, our analysis was limited to the study time at the early stage of  
44  
45 COVID-19 spread. Our hypothetical scenarios were based on counterfactual and backtrack the results to  
46  
47 compare with the current situations. Second, the finding of substantial variation in the geographic spread  
48  
49 across countries reflected heterogenous contact rates in different countries. Although the summary  
50  
51 statistics around the world demonstrated a global benefit by means of public health interventions, each  
52  
53 member state is encouraged to select appropriate countermeasures in its own setting to minimize the risk  
54  
55 of COVID-19 resurgence spread becoming endemic. Third, we assumed aggregated strategies which  
56  
57  
58  
59  
60

1  
2  
3  
4 could vary across different settings, and therefore result should be interpreted with caution. Nonetheless,  
5  
6 the rapid spread of this novel infectious diseases, demonstrated adverse impact on the entire world with  
7  
8 harms to the global health, economy, and social governance. The COVID-19 pandemic has posed a major  
9  
10 threat to our society, and no country could be immune to such complex issues and stay out of the  
11  
12 multinational collaborations. In the face of this global challenge, the principle of one health and one  
13  
14 world should be encouraged by all nations to achieve global governance in public health.  
15  
16  
17  
18

### 19 **Conclusion**

20  
21  
22 Number of COVID-19 infected cases around the world could have been largely prevented by public  
23  
24 health countermeasures in each country, and, to a lesser extent, by the global travel restriction. Rapid  
25  
26 response to this novel public health challenge requires multi-national collaborations to carry out timely  
27  
28 and intensive intervention strategies.  
29  
30  
31

### 32 **Contributors**

33  
34  
35 Conception and design of the work: WD, LCK, and YH; acquisition of data: LCK and YH; statistical  
36  
37 analysis: LCK and YH; interpretation of data: WD, LCK, and YH; drafted the manuscript and revised:  
38  
39 WD, LCK, YH, QW, YW, TY, XDC, HJ, and LJF. All authors revised the manuscript and read and  
40  
41 approved the final version.  
42  
43  
44

### 45 **Declaration of interests**

46  
47  
48 We declare no competing interests.  
49  
50

### 51 **Funding**

52  
53  
54 This study was supported by the Department of Education [No. 1125000172], National Science and  
55  
56 Technology Major Project of China [No. 2018ZX10713001], Jiangsu Provincial Major Science &  
57  
58  
59  
60

1  
2  
3  
4 Technology Demonstration Project [No. BE2017749], National Natural Science Foundation of China  
5  
6 [Grant Number:41101431, 41531179,41421001, 41471377, 71704192] and Fundamental Research  
7  
8 Funds for the Central Universities [No. 2017BD0094/9161017003/3225002002A1].  
9  
10

### 11 **Data sharing**

12  
13  
14 Data are available upon reasonable request. Requests for data access should be directed to the  
15  
16 corresponding author.  
17  
18

### 19 **Acknowledgments**

20  
21  
22 We thank Prof Yilan Liao for her advice and critical comments.  
23  
24

### 25 **Ethics**

26  
27 Provincial Health Commissions in mainland of China have reported municipal-level incident  
28  
29 numbers of COVID-19 suspected, confirmedly infected, recovered, and deceased individuals,  
30  
31 respectively on a daily basis since January 2020. These data were publically available and therefore  
32  
33 this study was exempted for ethics approval by institutional review boards with respect to data  
34  
35 collection, analysis and reporting.  
36  
37  
38  
39

### 40 **Figure caption**

41  
42  
43 Fig.1 The flowchart of transitions between compartments and movements between countries  
44

45  
46 Fig.2 Cumulative cases at days 150 in scenario 1  
47

48  
49 Fig.3 Cumulative cases at days 150 in scenario 7  
50

### 51 **References**

- 52  
53  
54 1 World Health Organization. Coronavirus disease 2019 (COVID-19) Dashboard. 2020. <https://covid19.who.int/>  
55  
56 [Accessed October 18, 2020].  
57  
58  
59  
60

- 1  
2  
3  
4 2 World Health Organization. Statement on the second meeting of the International Health Regulations (2005)  
5  
6 Emergency Committee regarding the outbreak of novel coronavirus (2019nCoV). January 30, 2020. Available  
7  
8 at: [https://www.who.int/news-room/  
9 detail/30-01-2020-statement-on-the-second-meeting-of-the-  
10 internationalhealth-regulations-\(2005\)-emergencycommittee-regarding-the-outbreakof-novel-coronavirus-  
11 \(2019-ncov\)](https://www.who.int/news-room/detail/30-01-2020-statement-on-the-second-meeting-of-the-international-health-regulations-(2005)-emergency-committee-regarding-the-outbreak-of-novel-coronavirus-(2019-ncov)) [Accessed January 31, 2020].  
12  
13  
14  
15  
16  
17 3 Flaxman S, Mishra S, Gandy A, et al. Estimating the effects of non-pharmaceutical interventions on COVID-  
18  
19 19 in Europe. *Nature*. 2020;584(7820):257-261.  
20  
21  
22 4 Lai S, Ruktanonchai NW, Zhou L, et al. Effect of non-pharmaceutical interventions to contain COVID-19 in  
23  
24 China. *Nature*. 2020;585(7825):410-413.  
25  
26  
27 5 Burki T. China's successful control of COVID-19. *Lancet Infect Dis*. 2020;20(11):1240-1241.  
28  
29  
30 6 World Health Organization. Updated WHO recommendations for international traffic in relation to COVID-  
31  
32 19 outbreak. [https://www.who.int/news-room/articles-detail/updated-who-recommendations-for-  
33 international-traffic-in-relation-to-covid-19-outbreak](https://www.who.int/news-room/articles-detail/updated-who-recommendations-for-international-traffic-in-relation-to-covid-19-outbreak) [Accessed 15 June 2020].  
34  
35  
36  
37 7 World Health Organization. International Health Regulations, WHA 58.3, 2nd edn, World Health Organization,  
38  
39 Geneva (2005).  
40  
41  
42 8 World Health Organization Director-General's statement on IHR Emergency Committee on Novel  
43  
44 Coronavirus (2019-nCoV). [https://www.who.int/dg/speeches/detail/who-director-general-s-statement-on-ihr-  
45 emergency-committee-on-novel-coronavirus-\(2019-nCoV\)](https://www.who.int/dg/speeches/detail/who-director-general-s-statement-on-ihr-emergency-committee-on-novel-coronavirus-(2019-nCoV)) (Jan 30, 2020) [Accessed 11th Feb, 2020].  
46  
47  
48  
49  
50 9 Devi S. Travel restrictions hampering COVID-19 response. *Lancet*. 2020;395(10233):1331-1332.  
51  
52  
53 10 Wells CR, Sah P, Moghadas SM, et al. Impact of international travel and border control measures on the global  
54  
55 spread of the novel 2019 coronavirus outbreak. *Proc Natl Acad Sci U S A*. 2020;117(13):7504-7509.  
56  
57  
58  
59  
60

- 1  
2  
3  
4 11 Anzai A, Kobayashi T, Linton NM, et al. Assessing the Impact of Reduced Travel on Exportation Dynamics  
5  
6 of Novel Coronavirus Infection (COVID-19). *J Clin Med.* 2020;9(2):601. Published 2020 Feb 24.  
7  
8  
9 12 Costantino V, Heslop DJ, MacIntyre CR. The effectiveness of full and partial travel bans against COVID-19  
10  
11 spread in Australia for travellers from China during and after the epidemic peak in China. *J Travel Med.*  
12  
13 2020;27(5):taaa081.  
14  
15  
16 13 Worldometer. Countries in the world by population (2020). [https://www.worldometers.info/world-  
19  
20 population/population-by-country/](https://www.worldometers.info/world-<br/>17<br/>18 population/population-by-country/) [Accessed 14 June, 2020].  
21  
22 14 Openflights. Airport, airline and route data. <https://openflights.org/data.html> [Accessed 14 June, 2020].  
23  
24 15 Widgren S, Eriksson R, Engblom S, Bauer P, Rosendal T, Chaos A. SimInf: A Framework for Data-Driven  
25  
26 Stochastic Disease Spread Simulations. Jun.18, 2020. <https://CRAN.R-project.org/package=SimInf> [Accessed  
27  
28 9 September, 2020].  
29  
30  
31 16 Widgren S, Bauer P, Eriksson R, Engblom S. SimInf: An R Package for Data-Driven Stochastic Disease  
32  
33 Spread Simulations. *J Stat Softw* 2019; 91(12): 42.  
34  
35  
36 17 Backer J, Klinkenberg D, Wallinga J. Incubation period of 2019 novel coronavirus (2019-nCoV) infections  
37  
38 among travellers from Wuhan, China, 20–28 January 2020. *Eurosurveillance* 2020; 25.  
39  
40  
41 18 Kucharski AJ, Russell TW, Diamond C, et al. Early dynamics of transmission and control of COVID-19: a  
42  
43 mathematical modelling study. *Lancet Infect Dis.* 2020;20(5):553-558  
44  
45  
46 19 International Air Transport Association (IATA). Travel news powered by IATA Timatic. April 1, 2020 2020.  
47  
48 <https://www.iatatravelcentre.com/international-travel-document-news/1580226297.htm> [Accessed May 10,  
49  
50 2020].  
51  
52  
53 20 Tian H, Liu Y, Li Y, et al. An investigation of transmission control measures during the first 50 days of the  
54  
55 COVID-19 epidemic in China. *Science.* 2020;368(6491):638-642.  
56  
57  
58  
59  
60

- 1  
2  
3  
4 21 Zhang J, Litvinova M, Liang Y, et al. Changes in contact patterns shape the dynamics of the COVID-19  
5 outbreak in China. *Science*. 2020;368(6498):1481-1486.  
6  
7  
8  
9 22 Haug N, Geyrhofer L, Londei A, et al. Ranking the effectiveness of worldwide COVID-19 government  
10 interventions. *Nat Hum Behav* 2020;4(12):1303-12.  
11  
12  
13  
14 23 Chinazzi M, Davis JT, Ajelli M, et al. The effect of travel restrictions on the spread of the 2019 novel  
15 coronavirus (COVID-19) outbreak. *Science*. 2020;368(6489):395-400.  
16  
17  
18  
19 24 Russell TW, Wu JT, Clifford S, et al. Effect of internationally imported cases on internal spread of COVID-  
20 19: a mathematical modelling study. *The Lancet Public Health* 2021;6(1):e12-e20.  
21  
22  
23  
24 25 Pan A, Liu L, Wang C, et al. Association of Public Health Interventions With the Epidemiology of the COVID-  
25 19 Outbreak in Wuhan, China. *JAMA* 2020; 323(19): 1-9.  
26  
27  
28  
29 26 Zhang J, Litvinova M, Wang W, et al. Evolving epidemiology and transmission dynamics of coronavirus  
30 disease 2019 outside Hubei province, China: a descriptive and modelling study. *Lancet Infect Dis*.  
31  
32  
33  
34 2020;20(7):793-802.  
35  
36  
37 27 Johns Hopkins University. COVID-19 Dashboard (2020); <https://coronavirus.jhu.edu/map.html> [Accessed 14  
38 June, 2020].  
39  
40  
41  
42 28 Castillo RC, Staguhn ED, Weston-Farber E. The effect of state-level stay-at-home orders on COVID-19  
43 infection rates. *Am J Infect Control*. 2020;48(8):958-960.  
44  
45  
46  
47 29 Mateus AL, Otete HE, Beck CR, Dolan GP, Nguyen-Van-Tam JS. Effectiveness of travel restrictions in the  
48 rapid containment of human influenza: a systematic review. *Bulletin of the World Health Organization* 2014;  
49  
50  
51  
52 92: 868-80D.  
53  
54  
55 30 von Tigerstrom B, Wilson K. COVID-19 travel restrictions and the International Health Regulations (2005).  
56  
57  
58  
59 *BMJ Glob Health*. 2020;5(5):e002629.  
60

1  
2  
3  
4  
5  
6  
7  
8  
9  
10  
11  
12  
13  
14  
15  
16  
17  
18  
19  
20  
21  
22  
23  
24  
25  
26  
27  
28  
29  
30  
31  
32  
33  
34  
35  
36  
37  
38  
39  
40  
41  
42  
43  
44  
45  
46  
47  
48  
49  
50  
51  
52  
53  
54  
55  
56  
57  
58  
59  
60

For peer review only

Table 1. Assumed scenarios to simulate the spread of COVID-19\*

| Scenarios    | Travel restrictions against China (from February 1) | Global travel restrictions (from March 20) | Public health countermeasures in China (from January 25) | Global public health countermeasures (from January 25) |
|--------------|-----------------------------------------------------|--------------------------------------------|----------------------------------------------------------|--------------------------------------------------------|
| 1 (baseline) | No                                                  | No                                         | No                                                       | No                                                     |
| 2            | Yes                                                 | No                                         | No                                                       | No                                                     |
| 3            | No                                                  | No                                         | Yes                                                      | No                                                     |
| 4            | Yes                                                 | No                                         | Yes                                                      | No                                                     |
| 5            | Yes                                                 | Yes                                        | No                                                       | No                                                     |
| 6            | Yes                                                 | Yes                                        | Yes                                                      | No                                                     |
| 7            | Yes                                                 | Yes                                        | Yes                                                      | Yes                                                    |



Table 2. Results for the run with median of the total cumulative number of infections.

| Scenarios                | Median of                         | Avoided median number of cases** | Reducing the estimated          |
|--------------------------|-----------------------------------|----------------------------------|---------------------------------|
|                          | cumulative infections at 150 days |                                  | median number of infections (%) |
| <b>1(baseline)</b>       | 420,520,763                       | -                                | -                               |
| <b>2</b>                 | 385,399,261                       | 35,121,502                       | 8.35                            |
| <b>3</b>                 | 5,809,925                         | 414,710,838                      | 98.62                           |
| <b>4</b>                 | 4,832,306                         | 415,688,457                      | 98.85                           |
| <b>5</b>                 | 417,781,694                       | 2,739,069                        | 0.65                            |
| <b>6</b>                 | 5,270,174                         | 415,250,589                      | 98.75                           |
| <b>7</b>                 | 133,575                           | 420,387,188                      | 99.97                           |
| <b>Actual reporting*</b> | 5,708,365                         | 414,812,398                      | 98.64%                          |

\*Number of confirmed cases were derived from WHO data reported on May 29, 2020 (150th day since January 1, 2020)

\*\* Compared with infections in baseline 1

1  
2  
3  
4  
5  
6  
7  
8  
9  
10  
11  
12  
13  
14  
15  
16  
17  
18  
19  
20  
21  
22  
23  
24  
25  
26  
27  
28  
29  
30  
31  
32  
33  
34  
35  
36  
37  
38  
39  
40  
41  
42  
43  
44  
45  
46  
47  
48  
49  
50  
51  
52  
53  
54  
55  
56  
57  
58  
59  
60

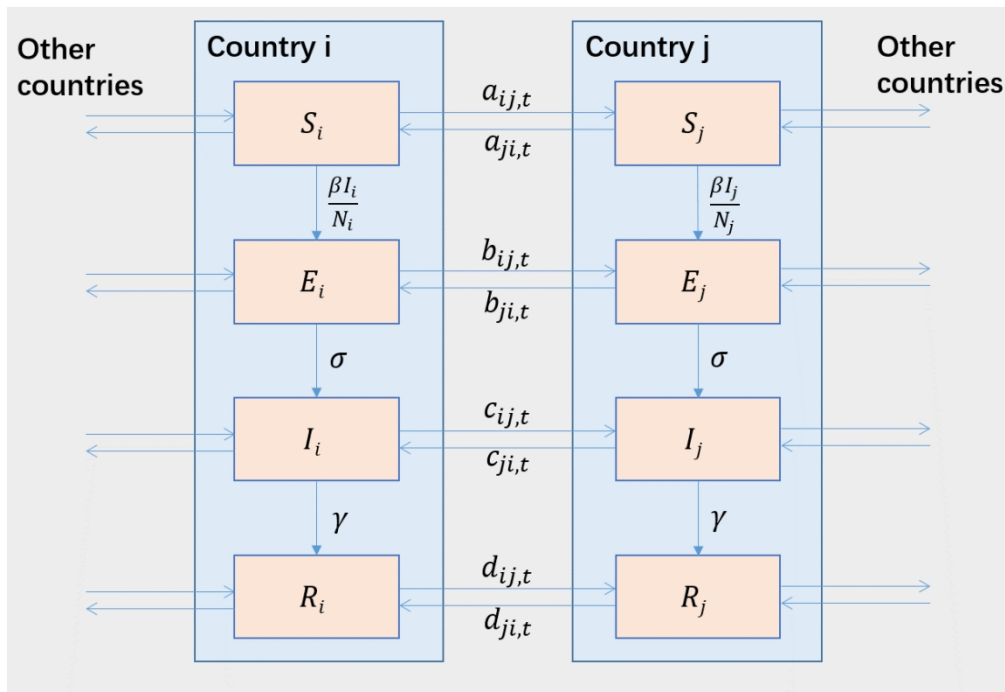

Fig.1 The flowchart of transitions between compartments and movements between countries

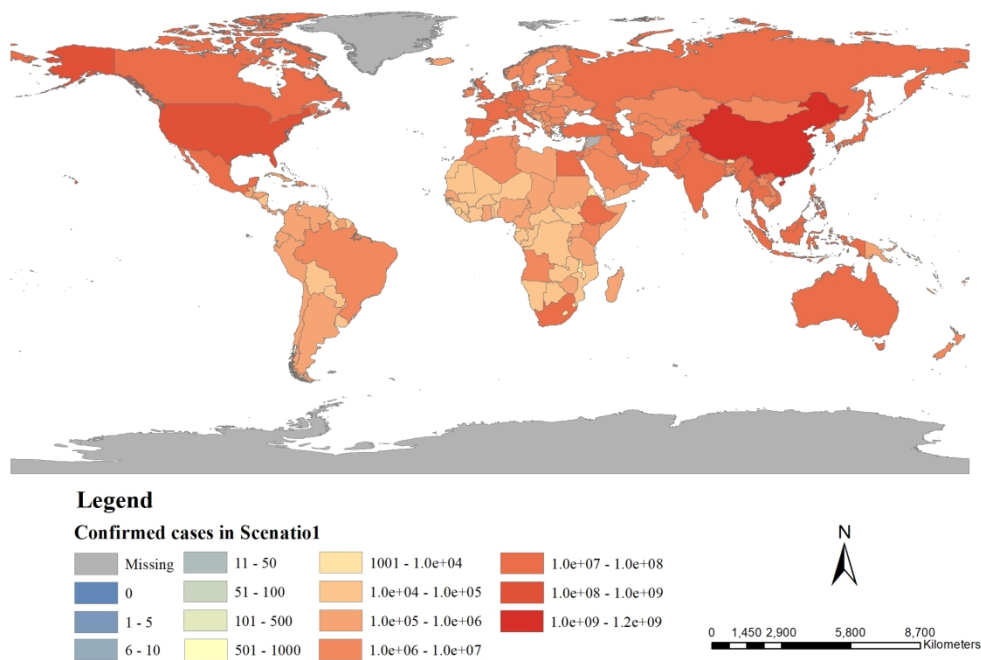

Fig.2 Cumulative cases at days 150 in scenario 1

1  
2  
3  
4  
5  
6  
7  
8  
9  
10  
11  
12  
13  
14  
15  
16  
17  
18  
19  
20  
21  
22  
23  
24  
25  
26  
27  
28  
29  
30  
31  
32  
33  
34  
35  
36  
37  
38  
39  
40  
41  
42  
43  
44  
45  
46  
47  
48  
49  
50  
51  
52  
53  
54  
55  
56  
57  
58  
59  
60

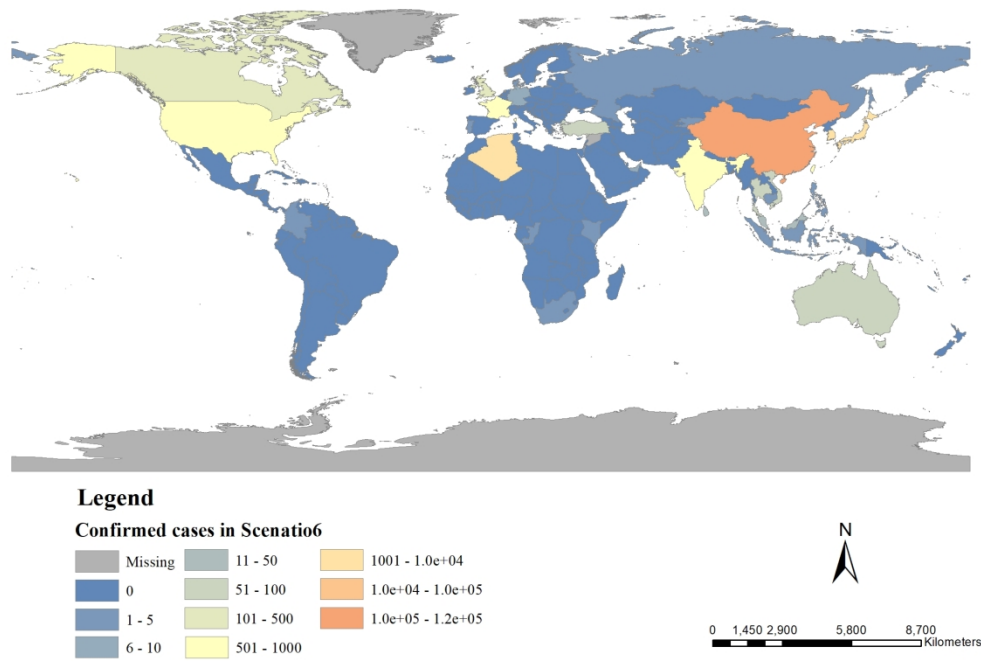

Fig.3 Cumulative cases at days 150 in scenario 7



Fig.S1 Cumulative cases at days 150 in scenario 2.

1  
2  
3  
4  
5  
6  
7  
8  
9  
10  
11  
12  
13  
14  
15  
16  
17  
18  
19  
20  
21  
22  
23  
24  
25  
26  
27  
28  
29  
30  
31  
32  
33  
34  
35  
36  
37  
38  
39  
40  
41  
42  
43  
44  
45  
46  
47  
48  
49  
50  
51  
52  
53  
54  
55  
56  
57  
58  
59  
60



Fig.S2 Cumulative cases at days 150 in scenario 3.



Fig.S3 Cumulative cases at days 150 in scenario 4.

1  
2  
3  
4  
5  
6  
7  
8  
9  
10  
11  
12  
13  
14  
15  
16  
17  
18  
19  
20  
21  
22  
23  
24  
25  
26  
27  
28  
29  
30  
31  
32  
33  
34  
35  
36  
37  
38  
39  
40  
41  
42  
43  
44  
45  
46  
47  
48  
49  
50  
51  
52  
53  
54  
55  
56  
57  
58  
59  
60

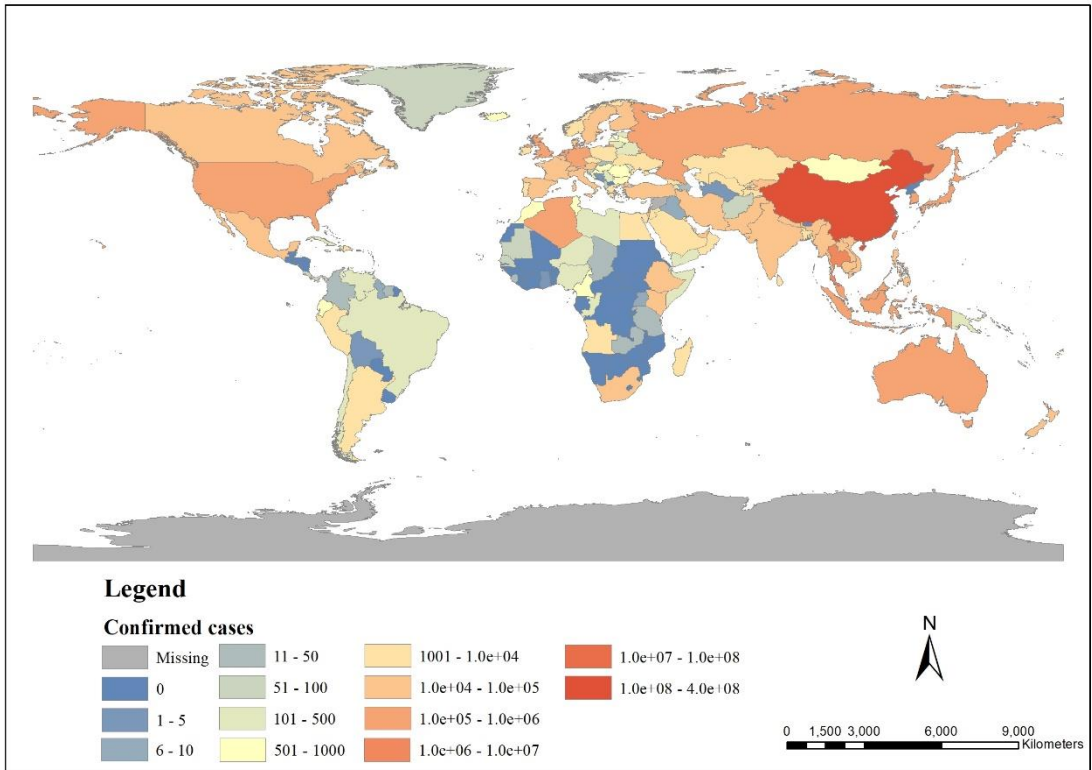

Fig.S4 Cumulative cases at days 150 in scenario 5.



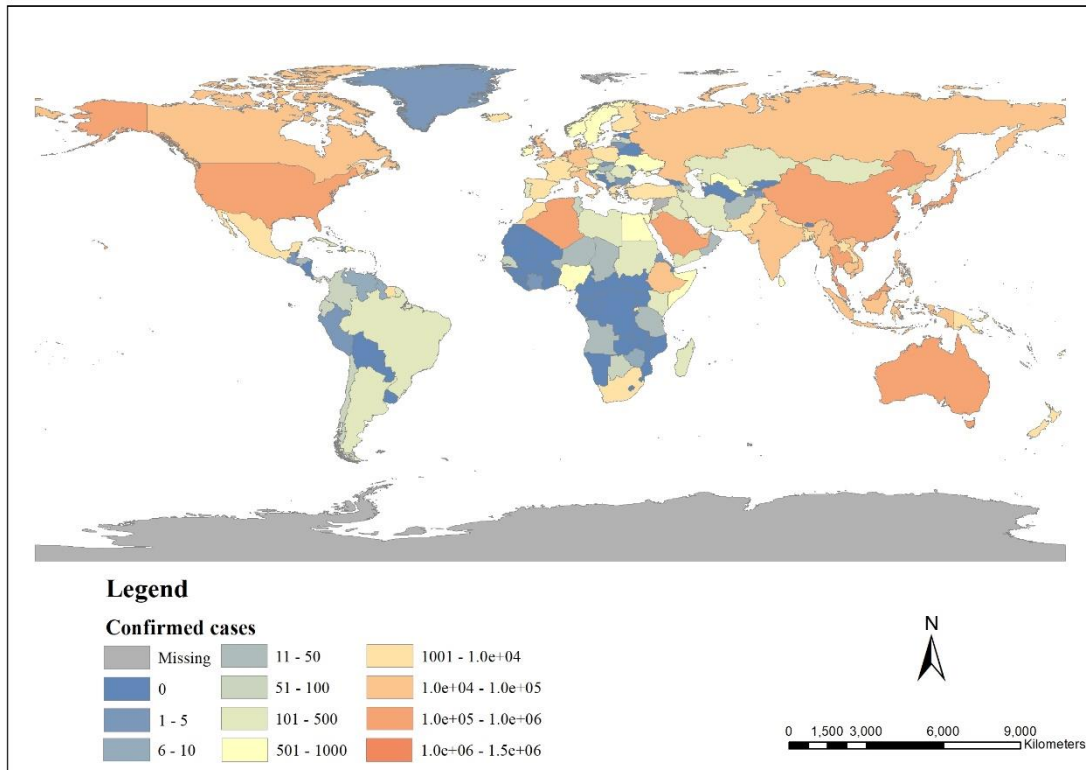

Fig.S5 Cumulative cases at days 150 in scenario 6.

## STROBE Statement—checklist of items that should be included in reports of observational studies

|                              | <b>Item No</b> | <b>Recommendation</b>                                                                                                                                                                                                                                                                                                                                                                                                                          | <b>Page No</b> |
|------------------------------|----------------|------------------------------------------------------------------------------------------------------------------------------------------------------------------------------------------------------------------------------------------------------------------------------------------------------------------------------------------------------------------------------------------------------------------------------------------------|----------------|
| <b>Title and abstract</b>    | 1              | (a) Indicate the study's design with a commonly used term in the title or the abstract                                                                                                                                                                                                                                                                                                                                                         | 1              |
|                              |                | (b) Provide in the abstract an informative and balanced summary of what was done and what was found                                                                                                                                                                                                                                                                                                                                            | 2              |
| <b>Introduction</b>          |                |                                                                                                                                                                                                                                                                                                                                                                                                                                                |                |
| Background/rationale         | 2              | Explain the scientific background and rationale for the investigation being reported                                                                                                                                                                                                                                                                                                                                                           | 3-4            |
| Objectives                   | 3              | State specific objectives, including any prespecified hypotheses                                                                                                                                                                                                                                                                                                                                                                               | 4              |
| <b>Methods</b>               |                |                                                                                                                                                                                                                                                                                                                                                                                                                                                |                |
| Study design                 | 4              | Present key elements of study design early in the paper                                                                                                                                                                                                                                                                                                                                                                                        | 5-7            |
| Setting                      | 5              | Describe the setting, locations, and relevant dates, including periods of recruitment, exposure, follow-up, and data collection                                                                                                                                                                                                                                                                                                                | 5              |
| Participants                 | 6              | (a) Cohort study—Give the eligibility criteria, and the sources and methods of selection of participants. Describe methods of follow-up<br>Case-control study—Give the eligibility criteria, and the sources and methods of case ascertainment and control selection. Give the rationale for the choice of cases and controls<br>Cross-sectional study—Give the eligibility criteria, and the sources and methods of selection of participants | NA             |
|                              |                | (b) Cohort study—For matched studies, give matching criteria and number of exposed and unexposed<br>Case-control study—For matched studies, give matching criteria and the number of controls per case                                                                                                                                                                                                                                         | NA             |
| Variables                    | 7              | Clearly define all outcomes, exposures, predictors, potential confounders, and effect modifiers. Give diagnostic criteria, if applicable                                                                                                                                                                                                                                                                                                       | 7              |
| Data sources/<br>measurement | 8*             | For each variable of interest, give sources of data and details of methods of assessment (measurement). Describe comparability of assessment methods if there is more than one group                                                                                                                                                                                                                                                           | 6              |
| Bias                         | 9              | Describe any efforts to address potential sources of bias                                                                                                                                                                                                                                                                                                                                                                                      | 7              |
| Study size                   | 10             | Explain how the study size was arrived at                                                                                                                                                                                                                                                                                                                                                                                                      | 5              |
| Quantitative variables       | 11             | Explain how quantitative variables were handled in the analyses. If applicable, describe which groupings were chosen and why                                                                                                                                                                                                                                                                                                                   | 6-7            |
| Statistical methods          | 12             | (a) Describe all statistical methods, including those used to control for confounding                                                                                                                                                                                                                                                                                                                                                          | 6              |
|                              |                | (b) Describe any methods used to examine subgroups and interactions                                                                                                                                                                                                                                                                                                                                                                            | NA             |
|                              |                | (c) Explain how missing data were addressed                                                                                                                                                                                                                                                                                                                                                                                                    | NA             |
|                              |                | (d) Cohort study—If applicable, explain how loss to follow-up was addressed<br>Case-control study—If applicable, explain how matching of cases and controls was addressed<br>Cross-sectional study—If applicable, describe analytical methods taking account of sampling strategy                                                                                                                                                              | NA             |
|                              |                | (e) Describe any sensitivity analyses                                                                                                                                                                                                                                                                                                                                                                                                          | NA             |

Continued on next page

| <b>Results</b>           |     |                                                                                                                                                                                                              |       |
|--------------------------|-----|--------------------------------------------------------------------------------------------------------------------------------------------------------------------------------------------------------------|-------|
| Participants             | 13* | (a) Report numbers of individuals at each stage of study—eg numbers potentially eligible, examined for eligibility, confirmed eligible, included in the study, completing follow-up, and analysed            | 8     |
|                          |     | (b) Give reasons for non-participation at each stage                                                                                                                                                         | NA    |
|                          |     | (c) Consider use of a flow diagram                                                                                                                                                                           | NA    |
| Descriptive data         | 14* | (a) Give characteristics of study participants (eg demographic, clinical, social) and information on exposures and potential confounders                                                                     | NA    |
|                          |     | (b) Indicate number of participants with missing data for each variable of interest                                                                                                                          | NA    |
|                          |     | (c) Cohort study—Summarise follow-up time (eg, average and total amount)                                                                                                                                     | NA    |
| Outcome data             | 15* | Cohort study—Report numbers of outcome events or summary measures over time                                                                                                                                  | NA    |
|                          |     | Case-control study—Report numbers in each exposure category, or summary measures of exposure                                                                                                                 | NA    |
|                          |     | Cross-sectional study—Report numbers of outcome events or summary measures                                                                                                                                   | NA    |
| Main results             | 16  | (a) Give unadjusted estimates and, if applicable, confounder-adjusted estimates and their precision (eg, 95% confidence interval). Make clear which confounders were adjusted for and why they were included | NA    |
|                          |     | (b) Report category boundaries when continuous variables were categorized                                                                                                                                    | NA    |
|                          |     | (c) If relevant, consider translating estimates of relative risk into absolute risk for a meaningful time period                                                                                             | NA    |
| Other analyses           | 17  | Report other analyses done—eg analyses of subgroups and interactions, and sensitivity analyses                                                                                                               | NA    |
| <b>Discussion</b>        |     |                                                                                                                                                                                                              |       |
| Key results              | 18  | Summarise key results with reference to study objectives                                                                                                                                                     | 9     |
| Limitations              | 19  | Discuss limitations of the study, taking into account sources of potential bias or imprecision. Discuss both direction and magnitude of any potential bias                                                   | 11-12 |
| Interpretation           | 20  | Give a cautious overall interpretation of results considering objectives, limitations, multiplicity of analyses, results from similar studies, and other relevant evidence                                   | 11-12 |
| Generalisability         | 21  | Discuss the generalisability (external validity) of the study results                                                                                                                                        | 9-10  |
| <b>Other information</b> |     |                                                                                                                                                                                                              |       |
| Funding                  | 22  | Give the source of funding and the role of the funders for the present study and, if applicable, for the original study on which the present article is based                                                | 12-13 |
