# Supplementary material for: Could COVID-19 pandemic be stopped with joint efforts of travel restrictions and public health countermeasures? A modelling study
Source: PubMed Central journal article supplement — BMJ Open. 2021 May 24;11(5):e046157. doi: 10.1136/bmjopen-2020-046157 (PMC8149266; doi:10.1136/bmjopen-2020-046157), 2021-05-24
Supplement: bmjopen-2020-046157supp001.pdf [file bmjopen-2020-046157supp001.pdf]

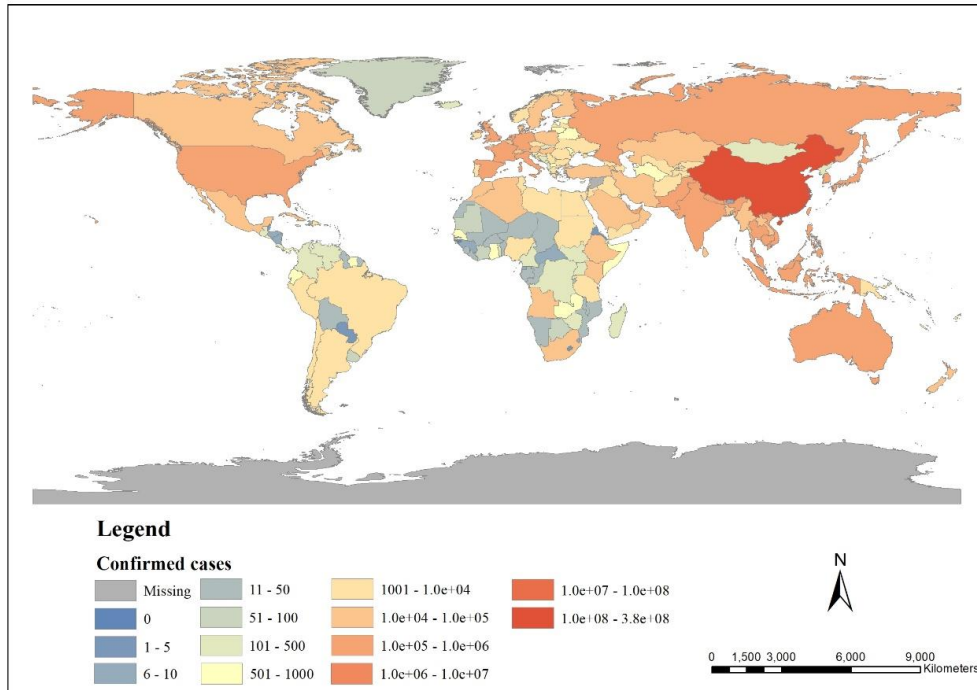

Fig.S1 Cumulative cases at days 150 in scenario 2.

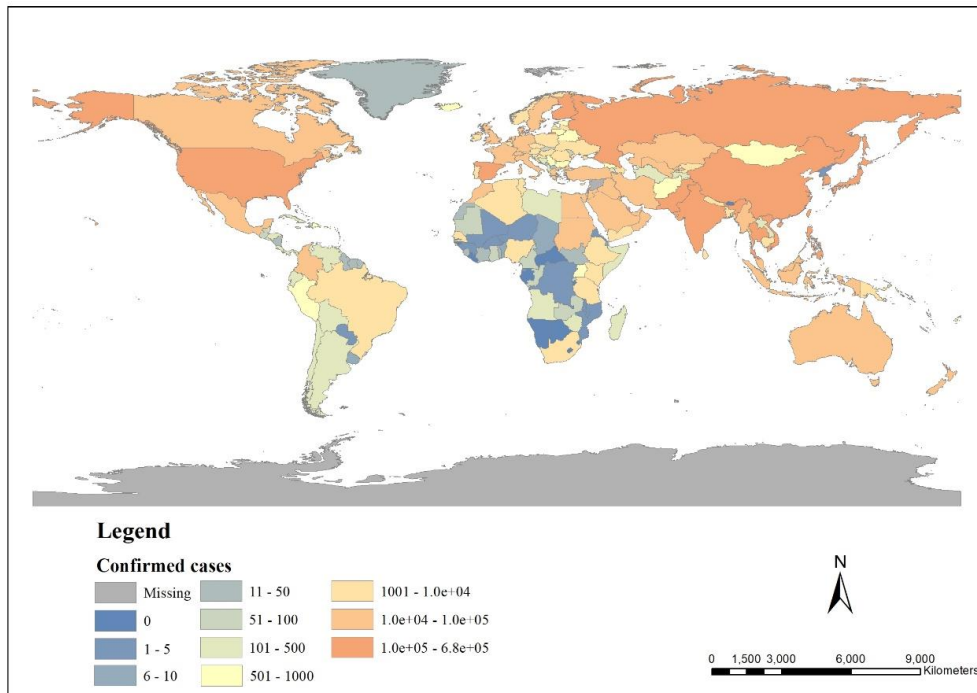

Fig.S2 Cumulative cases at days 150 in scenario 3.

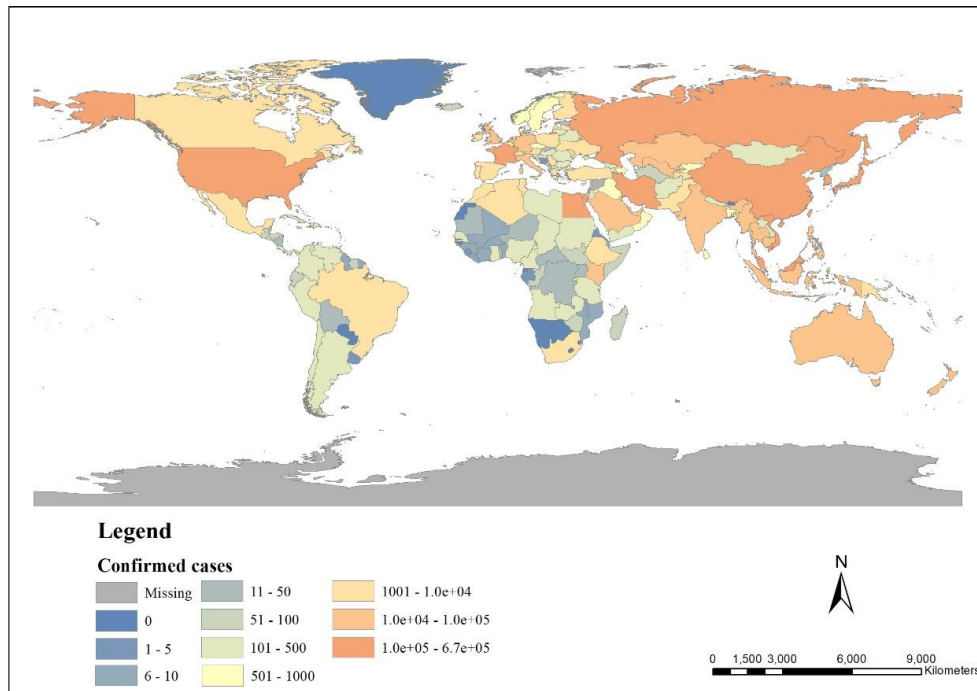

Fig.S3 Cumulative cases at days 150 in scenario 4.

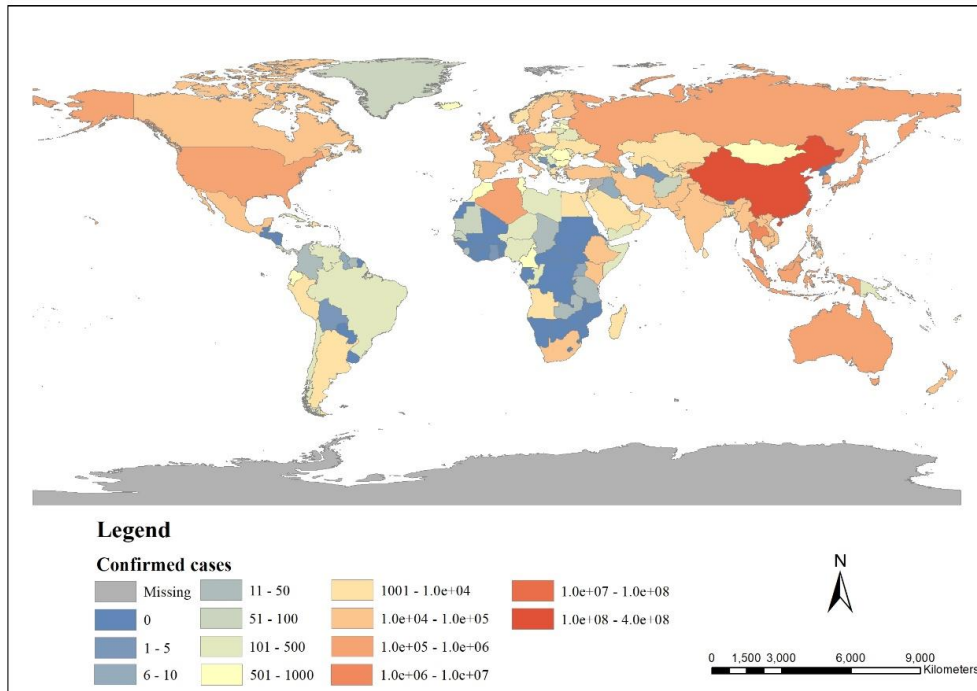

Fig.S4 Cumulative cases at days 150 in scenario 5.

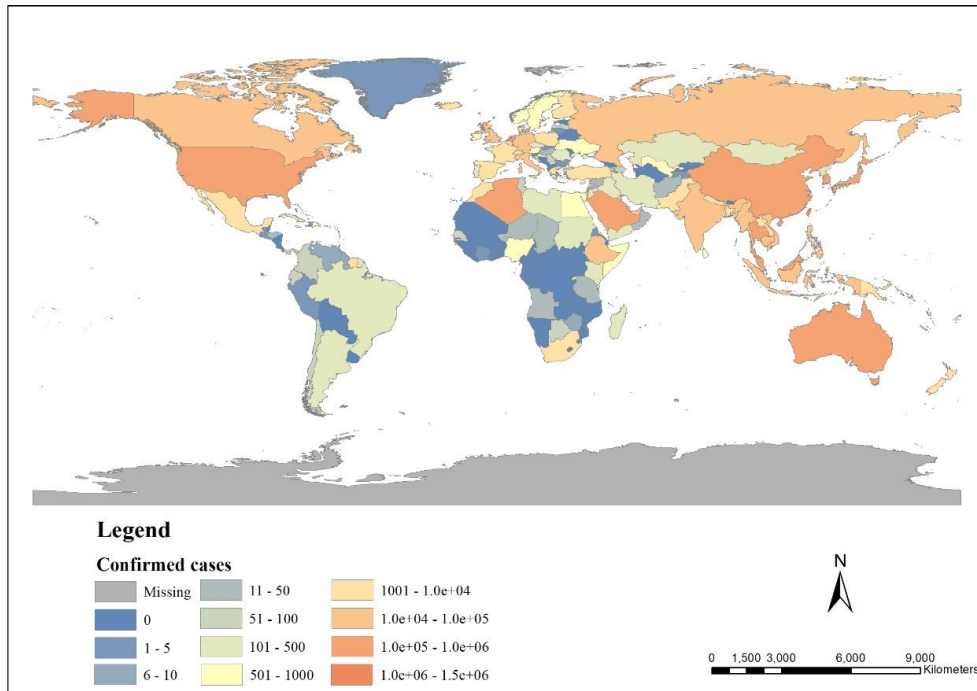

Fig.S5 Cumulative cases at days 150 in scenario 6.
